## ***Epichloë festucae* in mutualistic association with *Lolium perenne* suppresses host apoplastic cysteine protease activity**

Andrea Passarge <sup>1</sup>, Fatih Demir <sup>2</sup>, Kimberly Green <sup>3, 4</sup>, Jasper R.L. Depotter <sup>1</sup>, Barry Scott <sup>3, 4</sup>, Pitter F. Huesgen <sup>2,5,6</sup>, Gunther Doehlemann <sup>1\*</sup>, Johana C. Misas Villamil <sup>1\*</sup>

<sup>1</sup> Institute for Plant Sciences, University of Cologne, Cologne, Germany.

<sup>2</sup> Central Institute for Engineering, Electronics and Analytics, Forschungszentrum Jülich, Jülich, Germany.

<sup>3</sup> School of Fundamental Sciences, Massey University, Palmerston North, New Zealand.

<sup>4</sup> Bio-Protection Research Centre, Massey University, Palmerston North, NZ.

<sup>5</sup> Cologne Excellence Cluster for Stress Responses in Ageing-Associated Diseases (CECAD), University of Cologne, Cologne, Germany

<sup>6</sup> Institute for Biochemistry, University of Cologne, Cologne, Germany

\* Corresponding authors: [jmisas@uni-koeln.de](mailto:jmisas@uni-koeln.de), [gdoehlemann@uni-koeln.de](mailto:gdoehlemann@uni-koeln.de).

**Running title:** *Epichloë festucae* inhibits ryegrass apoplastic cysteine proteases

**Keywords:** apoplast, cystatin, endophyte, papain-like cysteine protease, ryegrass.

## Abstract

Plants secrete various defence-related proteins into the apoplast, including proteases. Papain-like cysteine proteases (PLCPs) are central components of the plant immune system. To overcome plant immunity and successfully colonise their hosts, several plant pathogens secrete effector proteins inhibiting plant PLCPs. We hypothesized that not only pathogens but also mutualistic microorganisms interfere with PLCP-mediated plant defences to maintain endophytic colonisation with their hosts. *Epichloë festucae* forms mutualist associations with cool season grasses and produces a range of secondary metabolites that protect the host against herbivores. In this study, we performed a genome wide identification of *Lolium perenne* PLCPs, analysed their evolutionary relationship and classified them into nine PLCP subfamilies. Using activity-based protein profiling, we identified four active PLCPs in the apoplast of *L. perenne* leaves that are inhibited during endophyte interactions. We characterized the *L. perenne* cystatin LpCys1 for its inhibitory capacity against ryegrass PLCPs. LpCys1 inhibits LpCP2, indicating that LpCys1 might play a role in the suppression of PLCP activity during the interaction with *E. festucae*. However, since the activity of other *L. perenne* PLCPs is not sensitive to LpCys1 we propose that additional inhibitors are involved in the suppression of apoplastic PLCPs during *E. festucae* infection.

## Introduction

1 Plants are continuously exposed to a great variety of microbes ranging from mutualists  
2 to pathogens. The epidermal surface and the apoplast are primary interfaces of plant-  
3 microbe interactions. The fungal endophyte *Epichloë festucae* forms symbiotic  
4 associations with temperate *Festuca* and *Lolium* grass hosts (Leuchtman *et al.*, 1994).  
5 Hyphae reside within the intercellular spaces between host cells and systemically  
6 colonise the apoplast within the leaf sheath, leaf blade and inflorescences (May *et al.*,  
7 2008; Scott *et al.*, 2012). In the later stages of host development, hyphae cease growing  
8 and become closely attached to the host cell wall by an adhesive matrix and remain  
9 metabolically active (Tan *et al.*, 2001; Christensen and Voisey, 2007). The intercellular  
10 growth of *E. festucae* within *Lolium perenne* is tightly regulated and the loss of key

11 signalling components leads to a disruption in symbiosis (Tanaka *et al.*, 2006, 2008,  
12 2013; Takemoto *et al.*, 2006, 2011; Eaton *et al.*, 2010; Becker *et al.*, 2015). This tight  
13 association between *E. festucae* hyphae and the host cell wall, has been proposed to  
14 facilitate endophyte-host crosstalk through the exchange of signalling molecules (Eaton  
15 *et al.*, 2011). To successfully colonise the host and survive within the apoplast, it has  
16 been proposed that *E. festucae* needs to suppress host defences (Schardl *et al.*, 2004;  
17 Scott *et al.*, 2018). The apoplast is a harsh environment that harbours hydrolytic  
18 enzymes such as chitinases and proteases, shown to be involved in plant defence  
19 response to microbes (Ökmen *et al.*, 2018; Thomas and van der Hoorn, 2018). Among  
20 these, apoplastic proteases such as Papain-Like Cysteine Proteases (PLCPs) are hubs  
21 in plant immunity (Misas Villamil *et al.*, 2016). PLCPs may release damage or microbe  
22 associated molecular patterns (DAMPs or MAMPs) as well as small signalling peptides  
23 which activate signalling cascades triggering the induction of defense responses  
24 (Ziemann *et al.*, 2018; Paulus *et al.*, 2020). They can also act as co-receptors and  
25 decoys to prevent pathogen colonization (Kourelis *et al.*, 2020). Accordingly, distant  
26 related plant pathogens have evolved effectors targeting PLCPs or their regulators,  
27 highlighting their importance in plant immunity (Krüger *et al.*, 2002; Rooney *et al.*, 2005;  
28 Song *et al.*, 2009; Kaschani *et al.*, 2010; Bozkurt *et al.*, 2011; Lozano-Torres *et al.*,  
29 2012; Clark *et al.*, 2018; Misas Villamil *et al.*, 2019). Pathogens can also manipulate the  
30 host to produce plant cystatins, cysteine protease inhibitors, to overcome defense  
31 responses. One example is CC9, a maize cystatin that suppresses host immunity during  
32 *Ustilago maydis* infection by inhibiting PLCPs (van der Linde *et al.*, 2012a). It has been  
33 proposed that like pathogenic fungi, plant endophytic fungi secrete effector molecules to  
34 promote host colonization (Zamioudis and Pieterse, 2012; Spanu and Panstruga, 2017).  
35 However, so far only a small number of effectors from mutualistic fungi, mostly  
36 mycorrhiza, have been identified and characterized (Kloppholz *et al.*, 2011; Plett *et al.*,  
37 2011, 2014; Wawra *et al.*, 2016; Perotto *et al.*, 2018; Nostadt *et al.*, 2020). Within the *E.*  
38 *festucae* F11 genome, 158 small (< 300 amino acid residues in length) secreted protein-  
39 encoding genes are predicted (Hassing *et al.*, 2019). Many of these are highly  
40 expressed *in planta*, and differentially regulated during pathogenic *E. festucae*  
41 associations caused by single gene deletions (Eaton *et al.*, 2010; Schardl *et al.*, 2013).

42 Mutations in *E. festucae* genes that disrupt cell-cell fusion and other key signalling  
43 pathways lead to an antagonistic interaction characterized by unregulated growth of  
44 endophytic hyphae and detrimental effects on host growth (Scott *et al.*, 2018).  
45 Furthermore, key components of the activation of immune responses such as host  
46 pathogenesis related (PR) and respiratory burst responses genes are down regulated  
47 during mutualistic *E. festucae* associations (Dupont *et al.*, 2015). Although these  
48 findings have made significant contributions towards our understanding of the *E.*  
49 *festucae* - host system, it is still largely unknown how *E. festucae* successfully  
50 modulates host defence responses. In this study, we investigate the role of apoplastic  
51 PLCPs of *L. perenne* during the interaction with *E. festucae*. Through computational and  
52 proteomic approaches, we identified several PLCPs present and active in the leaf  
53 apoplast of *L. perenne*. We show that commonly active PLCPs of uninfected plants are  
54 inhibited in response to *E. festucae* interaction. We further identified an apoplastic *L.*  
55 *perenne* - derived cystatin and analysed its inhibitory effect on apoplastic PLCPs.

56

57

## 58 **Materials and methods**

### 59 *Plant material*

60 *Lolium perenne* cv Samson and *Nicotiana benthamiana* plants were grown in  
61 greenhouse with long day period (16 h light) at 23°C and 8 h dark period at 20 °C with  
62 30 – 40% humidity. *Lolium perenne* infected FI1 and CT plants were kindly provided by  
63 Dr. Yvonne Becker (JKI, Julius Kühn - Institute, Braunschweig, Germany).

64

### 65 *Strains and plasmid construction*

66 The Golden gate modular cloning system was used to generate plasmids used for the  
67 heterologous expression of PLCPs in *N. benthamiana*. All Oligonucleotides used for  
68 PCR are listed in suppl. Table S1. To obtain pL1M-F1-LpCP2::2x35S, pL1M-F1-  
69 LpXCP2::2x35S and pL1M-F1-LpCathB::2x35S, LpCP2 (maker-  
70 scaffold\_4870|ref0016801-exonerate\_est2genome-gene-0.3), LpXCP2 (maker-  
71 scaffold\_182|ref0000331-exonerate\_est2genome-gene-0.0) and LpCathB (maker-  
72 scaffold\_11872|ref0015306-exonerate\_est2genome-gene-0.3) were amplified from *L.*  
73 *perenne* cDNA via PCR. pL1M-F1-LpCP1::2x35S was amplified from LpCP1 (maker-  
74 scaffold\_2516|ref0039699-exonerate\_est2genome-gene-0.3) leaving out the DNA  
75 sequence coding for the granulin domain. pL1M-F1-CP1Amut-nogran-mCherry::2x35S  
76 is described in Schulze Hüynck *et al.*, 2019. The DNA fragments were ligated as  
77 previously described in Weber *et al.*, 2011 and transformed first into *E. coli* Top10  
78 competent cells and then into *A. tumefaciens* GV3101 competent cells for  
79 overexpression in *N. benthamiana*. For the expression of LpCys1 in *E. coli*, R\_12141  
80 (maker-scaffold\_12141|ref0031444-exonerate\_est2genome-gene-0.0) was amplified  
81 without signal peptide using *L. perenne* cDNA. Subsequently, the PCR product was  
82 ligated with the PvuII-HF digested plasmid pRSET-GST-PP to obtain pRSET-PP-  
83 LpCys1-noSP, which was transformed to *E. coli* BL21 (DE3)pLysS competent cells. All  
84 strains used are listed in suppl. Table S2.

85

### 86 *Heterologous expression of PLCPs in N. benthamiana leaves*

87 *Agrobacterium tumefaciens*, containing the desired construct, were grown at 28°C in  
88 liquid dYT media, supplemented with the appropriate antibiotics, until an OD<sub>600</sub> between

89 0.8 and 1.6 was reached. The cultures were diluted with 10 mM magnesium chloride to  
90 a final OD<sub>600</sub> of 1. After at least one h incubation in darkness with 200 µM  
91 acetosyringone (Sigma-Aldrich, Taufkirchen, Germany), 5 - 6 weeks old *N. benthamiana*  
92 leaves were infiltrated with a needleless tuberculin-syringe.

93

#### 94 *Apoplastic fluid isolation from N. benthamiana and L. perenne leaves*

95 Isolation of *N. benthamiana* apoplastic fluids was performed as described in Schulze  
96 Hünck *et al.*, 2019. In short, three days post *Agrobacterium* infiltration *N. benthamiana*  
97 leaves were harvested, and vacuum infiltrated with MilliQ water three times for 5 min at  
98 60 mbar with a 2 min interval of atmospheric pressure. The leaves were surface dried,  
99 transferred to Falcon tubes and centrifuged for 20 min at 2000 *g* to isolate the  
100 apoplastic fluid. If not used directly, the apoplastic fluid was stored at -20°C. *L. perenne*  
101 leaves were cut ca. 3 cm above soil to avoid damage to the shoot apical meristem. The  
102 leaves were gently separated, and vacuum infiltrated with MilliQ water three times for 10  
103 min at 60 mbar with a 2 min interval of atmospheric pressure and otherwise treated as  
104 *N. benthamiana* leaves.

105

#### 106 *Activity Based Protein Profiling (ABPP)*

107 Leaf apoplastic fluid was incubated in darkness for 2 h at room temperature (RT) in 50  
108 mM sodium acetate, 10 mM DTT, DMSO and 0.2 µM of activity based probe MV201 or  
109 MV202 (Richau *et al.*, 2012). Prior to labelling one set of samples were pre-incubated  
110 with 10 µM or 20 µM E-64 (Sigma-Aldrich, St. Louis, Mississippi, USA), as negative  
111 control. Labelling was stopped by the addition of 500 µl acetone, followed by protein  
112 precipitation overnight at -20°C. The supernatant was discarded after samples were  
113 centrifuged for 30 min at max. speed and 4°C. The pellet was resuspended in water and  
114 1 × SDS-loading dye. Samples were boiled for 5 min at 95°C and separated via SDS-  
115 PAGE using 12% or 15% SDS gels. MV202 and MV201 labelled proteins were  
116 visualised by in-gel fluorescent scanning using a rhodamine filter (Ex. 532 nm, Em. 580  
117 nm) using the Chemi-Doc MP System (Bio-Rad, California, USA). Sample loading was  
118 visualised via SyproRuby stain (Ex. 450 nm, Em. 610 nm; SyproRuby Invitrogen,  
119 Carlsbad, California, USA), performed according to manufacturer's instructions. The

120 Quantification of PLCP-signal via rhodamine signal strength was performed using the  
121 ImageLab™ software (Bio-Rad, Hercules, CA, United States). For convolution ABPPs,  
122 apoplastic fluid of mock and *E. festucae* infected *L. perenne* plants was mixed in a 1:1  
123 ratio and incubated for 1 h at RT prior to labelling. Samples were labelled with MV202  
124 as described above. After labelling, the apoplastic fluid of mock and *E. festucae* infected  
125 *L. perenne* plants was mixed in a 1:1 ratio. Subsequently, samples were treated as  
126 previously described. For the inhibition assays, apoplastic fluid was extracted from *N.*  
127 *benthamiana* plants expressing *L. perenne* PLCPs. Prior to labelling the apoplastic fluid  
128 was incubated for 30 min with different concentrations of recombinant LpCys1 or  
129 chicken egg white cystatin (CEWC, Sigma-Aldrich, St. Louis, Mississippi, USA) and Tris-  
130 HCl (24 mM Tris, 71 mM NaCl; pH 7.5). As negative control one set of samples was  
131 pre-incubated with 20 µM E-64 (Sigma-Aldrich, St. Louis, Mississippi, USA).  
132 Subsequently, samples were treated as described above.

133

#### 134 *PLCP pulldown using streptavidin beads*

135 Leaf apoplastic fluid of three uninfected *L. perenne* plants was isolated as described  
136 before. Apoplastic fluid (2.35 ml) was incubated for 4 h at RT in 50 mM sodium acetate  
137 pH 6, 10 mM DTT and 2 mM DCG-04 (Greenbaum *et al.*, 2000). As a negative control,  
138 one set of samples was incubated with an equivalent amount of DMSO instead of DCG-  
139 04. The pulldown experiment was subsequently performed as described in Schulze  
140 Hüynck *et al.*, 2019.

141

#### 142 *Apoplast proteome sample preparation*

143 Three biological replicates of ryegrass apoplast fluid were collected, proteins purified by  
144 chloroform/methanol precipitation, cysteine residues reduced with 10 mM DTT and  
145 alkylated with 30 mM IAA and digested with MS-grade Trypsin (Serva) for 16 h at 37°C.  
146 Stable isotope labelling was achieved by reductive dimethylation of peptide N-terminal  
147 and Lys side chain primary amines with 20 mM CH<sub>2</sub>O and 20 mM NaBH<sub>3</sub>CN (+28.0313  
148 Da) for mock treated plants, 20 mM CD<sub>2</sub>O and 20 mM NaBH<sub>3</sub>CN (+32.0564 Da) for CT-  
149 infected plants and 20 mM <sup>13</sup>CD<sub>2</sub>O and 20 mM NaBD<sub>3</sub>CN (+36.0756 Da) for FI1  
150 treatment (Boersema *et al.*, 2009). Labelling reactions were quenched with final 100

151 mM Tris-HCl pH 6.8 for 1h at RT, pooled in a 1:1:1 ratio and subsequently separated in  
152 three fractions at high pH (10%/15%/20% ACN, 10 mM NH<sub>4</sub>OH) followed by a final  
153 elution at acidic pH (50% ACN, 0.1% formic acid (FA)). The fractions were evaporated  
154 to dryness in a vacuum concentrator and reconstituted in 2% can, 0.1% FA prior to  
155 LC/MS analysis.

156

#### 157 *Nano LC-MS/MS measurements*

158 LC-MS/MS analysis was performed with an UltiMate 3000 RSCL nano-HPLC system  
159 (Thermo) online coupled to an Impact II Q-TOF mass spectrometer (Bruker) via a  
160 CaptiveSpray ion source boosted with acetonitrile-saturated nitrogen gas stream.  
161 Peptides were loaded on a Acclaim PepMap100 C18 trap column (3 μm, 100 Å, 75 μm  
162 i.d. x 2 cm, Thermo) and separated on a Acclaim PepMap RSLC C18 column (2 μm,  
163 100 Å, 75 μm i.d. x 50 cm, Thermo) with a 2h elution protocol that included an 80min  
164 separation gradient from 5% to 35% solvent B (solvent A: H<sub>2</sub>O + 0.1% FA, solvent B:  
165 can, 0.1% FA) at a flow of 300 nL/minute at 60 °C. Line-mode MS spectra were  
166 acquired in mass range 200 – 1400 m/z with a Top14 method at 4 Hz sampling rate for  
167 MS1 spectra and an intensity-dependent acquisition rate of 5 to 20 Hz for MS2 spectra.  
168 The capillary voltage for the CaptiveSpray ion source was 1600V. Collision energies of  
169 7 eV and 9 eV were applied in two equal steps with the ion transfer time set to 61 and  
170 100 μs, respectively, during acquisition of each MS2 spectrum.

171

#### 172 *Mass spectrometry data analysis*

173 Peptides were identified by matching spectra against a combination of a custom  
174 *Epichloë festucae* database (Efl11\_Proteins\_Annotated\_2020-05.fasta, containing 7077  
175 sequences, Aug. 2018), a *Lolium perenne* database (lope\_proteins.V1.0.fasta, 40068  
176 entries, downloaded 18/03/2019, Byrne *et al.*, 2015) and the sequences of maize and  
177 Arabidopsis PLCPs (PLCPs\_Ath+Maize.fasta", 52 entries) using the Andromeda search  
178 engine integrated into the MaxQuant software package (version 1.6.0.16) with standard  
179 settings (Tyanova *et al.*, 2016). Carbamidomethylation of cysteine (+ 56.0214 Da) was  
180 set as a fixed peptide modification. Oxidation of methionine (+ 15.9949 Da) and  
181 acetylation of protein N-termini (+ 42.0106 Da) were set as variable modifications. For



182 the apoplast proteome sample, triplex dimethyl isotope labelling with light ((CH<sub>3</sub>)<sub>2</sub>,  
183 +28.0313 Da), medium ((CD<sub>2</sub>H)<sub>2</sub>,+32.0564 Da) and heavy (<sup>13</sup>CD<sub>3</sub>)<sub>2</sub>, (+36.0756 Da)  
184 dimethyl label at Lys residues and peptide N-termini was additionally considered. The  
185 “requantify” option was enabled and false discovery rates (FDR) for peptide sequence  
186 matches and protein identifications were set to < 0.01. Only proteins quantified in at  
187 least 2 of the 3 biological replicates were used for pairwise comparisons of each of the  
188 three conditions. Protein ratios were median-normalized within each replicate before  
189 assessing differential expression with a moderated *t*-test using the “limma” package for  
190 R (Ritchie *et al.*, 2015). Proteins changing at least 50% in abundance (log<sub>2</sub> fold change  
191 <-0.58 or > 0.58) supported by a moderated *t*-test p-value < 0.05 and were considered  
192 significantly changed in abundance.

193

#### 194 *Recombinant expression and purification of LpCys1*

195 The Plasmid pRSET-GST-PP-LpCys1-noSP was transformed into *E. coli* BL21  
196 (DE3)pLysS competent cells (Novagen/Merck, Darmstadt, Germany). An overnight  
197 culture grown in dYT medium supplemented with 100 µg/ml carbenicillin and 34 µg/ml  
198 chloramphenicol was diluted to an OD<sub>600</sub> of 0.1 with dYT supplemented with 100 µg/ml  
199 carbenicillin and grown at 37°C and 200 rpm to an OD<sub>600</sub> of 0.6. The LpCys1 expression  
200 was induced with 1 mM IPTG. After 4 h at 37°C and 200 rpm, the cells were harvested  
201 by centrifuging for 30 min at 4°C and 6,000 rpm (JA-10, Beckman Coulter®). The cells  
202 were resuspended in 1x PBS (pH 7.3) and 1 µl benzonase (Sigma-Aldrich, St. Louis,  
203 Mississippi, USA) and protease inhibitor mix was added. The mix was incubated for 30  
204 min at RT, followed by the addition of 5 mM DTT and sonification. The insoluble cell  
205 debris was removed via centrifugation for 30 min at 4°C and 20,000 rpm (JA-25.50,  
206 Beckman Coulter®). The supernatant was incubated for 1 h with low agitation and with  
207 1.2 ml Glutathione-sepharose (GE-Healthcare, Uppsala, Sweden) that was equilibrated  
208 three times with 12 ml cold 1x PBS (pH 7.3). The mix was subsequently applied to a  
209 flow-through column and the column was washed three times with 12 ml 1x PBS (pH  
210 7.3) with 5 mM DTT and once with PreScission cleavage buffer (50 mM Tris-HCl pH7.5,  
211 150 mM NaCl, 1 mM EDTA, 1 mM DTT). PreScission protease mix was added and  
212 incubated on the column overnight at 4 °C. The flow-through was collected. The

213   sepharose matrix was washed three times with 1.2 ml PreScission cleavage buffer and  
214   the flow-through was collected and all collected flow-through fractions were pooled. The  
215   pooled protein sample was treated as describe in Mueller *et al.*, 2013. The HiLoad®  
216   16/600 Superdex® 75 pg column (GE Healthcare, Chicago, Illinois, USA) with Tris-HCl  
217   buffer (50 mM Tris-HCl, 150 mM NaCl, 5 mM DTT, pH 7.5) was used for gel filtration  
218   and Vivaspin 15 with 5 MWCO (Sartorius Stedim Biotech GmbH, Goettingen, Germany)  
219   was used to concentrate the final protein fractions containing LpCys1.

220

### 221 *Identification and phylogenetic analysis of PLCPs and cystatins in L. perenne*

222   Predicted proteins of *Lolium perenne* were obtained from Byrne *et al.*, 2015 and a  
223   functional prediction was carried out using InterProScan (v5.32-71.0). Subsequently it  
224   was scanned for PLCP associated PFAM number PF00112 and the program SignalP  
225   (v4.1) was used to identify those with an N-terminal secretion signal. All original  
226   identifiers are listed in suppl. Table S3. The PLCP phylogenetic tree was generated  
227   using the identified PLCPs in *L. perenne* as well as 52 maize PLCP sequences from the  
228   MEROPS database (B73 line), six maize PLCPs identified in the early golden bantam  
229   line and 39 barley PLCP sequences (Díaz-Mendoza *et al.*, 2014; Rawlings *et al.*, 2018;  
230   Schulze Hüynck *et al.*, 2019). One PLCP of each PLCP subfamily from *Arabidopsis*  
231   *thaliana* were also included in the tree (Richau *et al.*, 2012), as well as four *A. thaliana*  
232   cysteine proteases of the family C13 (legumains)  $\alpha$ -VPE (AEC07775.1),  $\beta$ -VPE  
233   (OAP12170.1),  $\gamma$ -VPE (OAO96694.1) and  $\delta$ -VPE (OAP02173.1). Sequences used for  
234   the phylogenetic analysis of plant PLCPs can be found in suppl. Dataset S1. For the  
235   construction of the tree MAFFT (v7.407), RAxML (v8.2.12) with the PROTGAMMAWAG  
236   substitution model were used (Katoh and Standley, 2013; Stamatakis, 2014). The  
237   original phylogenetic tree can be found in suppl. Fig. S1. For the plant cystatins a  
238   phylogenetic tree was generated by aligning the full-length protein sequences (suppl.  
239   Dataset S2) of the identified apoplastic *L. perenne* cystatins LpCys1, LpCys4 and  
240   LpCys9 as well as cystatin sequences from *H. vulgare* (HvCPI), *Z. mays* (CC), *O. sativa*  
241   (OC) and *A. thaliana* (AtCYS) using MAFFT (v7.407) (Martinez *et al.*, 2009; Martínez *et*  
242   *al.*, 2012; van der Linde *et al.*, 2012b; Katoh and Standley, 2013; Stamatakis, 2014).  
243   The unrooted radial tree was generated with RAxML (v8.2.12) using the substitution

244 model PROTGAMMAWAG (Stamatakis, 2014). 100 bootstraps were performed,  
245 bootstrap values a given in the tree. The trees were visualised with FigTree (v1.4.2,  
246 <http://tree.bio.ed.ac.uk/software/figtree>).

247

## 248 **Results**

249

### 250 *Apoplastic PLCP activity is reduced during E. festucae interaction*

251

252 Inhibition of apoplastic PLCPs has been shown to be crucial for successful infection by  
253 a diversity of pathogens (Misas Villamil *et al.*, 2016) but their role in colonization by  
254 fungal endophytes is not known. In nature, different *E. festucae* strains exhibit varying  
255 degrees of host specificity and host colonisation (Scott *et al.*, 2018). In our analysis we  
256 therefore included two *E. festucae* strains, FI1 and Common Toxic (CT). FI1 is a  
257 commonly used laboratory strain that can be artificially inoculated into the host *L.*  
258 *perenne*, while CT is a naturally occurring endophyte of *L. perenne*. To determine if the  
259 leaf apoplastic PLCP activity of *L. perenne* is modulated during the interaction with *E.*  
260 *festucae*, PLCP activity was monitored using activity-based protein profiling (ABPP; Fig.  
261 1). Leaf apoplastic fluid (AF) was extracted from mock and infected plants. One set of  
262 plants was infected with the *E. festucae* strain FI1 (sexual form), the other set of plants  
263 was naturally infected seed with *E. festucae* var. *lolii* strain CT (Common toxic, asexual  
264 form). AF was labelled with the activity based probe MV201 which contains an epoxide  
265 specific E-64-based inhibitor group that covalently and irreversibly binds to the active  
266 site of PLCPs (Richau *et al.*, 2012). A fluorescent BODIPY moiety allows the detection  
267 of MV201 labelled PLCPs. Uninfected (E-) plants showed the strongest apoplastic  
268 PLCP signals at ca. 35 kDa that were out competed showing a decrease in signal  
269 intensity when the PLCP specific inhibitor E-64 was added in excess. In comparison to  
270 uninfected plants, apoplastic PLCP activity in *E. festucae* FI1 and CT infected plants  
271 was significantly reduced (Fig. 1A). Notably, AFs from plants infected with the FI1 strain  
272 showed a stronger PLCP signal reduction than AFs from CT infected plants.  
273 Furthermore, the SyproRuby loading control showed proteome differences between  
274 endophyte infected samples. Despite of a high diversity in protein patterns between

275 treatments, a distinct signal intensity for proteins at ca. 35 kDa was observed in FI1  
276 samples, which was less intense in E- and CT samples (Fig. 1B). These findings  
277 indicate that endophyte infection alters the host apoplastic proteome whereas PLCP  
278 activity, a key component of plant immunity, is reduced during *E. festucae* interactions,  
279 particularly in response to FI1 interactions.

280 To characterize PLCP modulation in *L. perenne* plants it is essential to identify  
281 the PLCPs in this plant species and classify them into the nine PLCP subfamilies  
282 (Richau *et al.*, 2012). Although PLCPs are crucial for many processes including plant  
283 development, senescence and plant defence, the peptidase database MEROPS only  
284 lists one PLCP, MER0345289, for *L. perenne*, belonging to the apoplastic PLCP  
285 subfamily C1A (Rawlings *et al.*, 2018). In other plant species the number of identified  
286 PLCPs ranged from 63, 48, 42, 36, and 30 in maize, sorghum, barley, Arabidopsis and  
287 rice, respectively (Díaz-Mendoza *et al.*, 2014; Sekhon *et al.*, 2019). We performed a  
288 functional protease domain screen via InterProScan ([www.ebi.ac.uk/interpro](http://www.ebi.ac.uk/interpro)) using the  
289 public genome annotation of Byrne *et al.*, 2015. Subsequently, the presence of PLCP  
290 related PFAM domains and IPR identifiers to determine further *L. perenne* PLCPs was  
291 evaluated. This search identified 23 *L. perenne* PLCPs containing an N-terminal signal  
292 peptide and a C1A protease domain (Suppl. Table S3 and Suppl. Dataset S1). To  
293 classify these newly identified PLCPs into the nine PLCP subfamilies (Richau *et al.*,  
294 2012), protein sequences were compared to other plant PLCPs and phylogenetically  
295 analysed. The 23 newly identified PLCPs, 58 maize PLCP sequences (Rawlings *et al.*,  
296 2018; Schulze Hüynck *et al.*, 2019), 38 barley sequences (Díaz-Mendoza *et al.*, 2014)  
297 and one member of each PLCP subfamily of Arabidopsis (Richau *et al.*, 2012) were  
298 used to generate a phylogenetic tree using the maximum likelihood method (Fig. 2).  
299 Sequences from the four Arabidopsis cysteine proteases of the family C13 (legumains)  
300  $\alpha$ -VPE,  $\beta$ -VPE,  $\gamma$ -VPE and  $\delta$ -VPE were used as outgroup. This analysis showed that  
301 the largest group of *L. perenne* PLCPs belong to the subfamilies TH11 (5 members),  
302 SAG12 (5 members) and RD21 (4 members). The remaining seven PLCPs are  
303 distributed among the XCP2, RD19A, CTB3, AALP and CEP1 subfamilies (Fig. 2). The  
304 four *L. perenne* PLCPs R\_2516 (RD21-like, subfamily I), R\_4870 (AALP-like, subfamily  
305 VIII), R\_182 (XCP2-like, subfamily III) and R\_11872 (CTB3-like, subfamily IX) were

306 identified as closely related to the well characterized maize apoplastic PLCPs CP1,  
307 CP2, XCP2 and CathB, respectively (van der Linde *et al.*, 2012a). Therefore, we re-  
308 named these *L. perenne* PLCPs to LpCP1, LpCP2, LpXCP2 and LpCathB (Fig. 2).

309

310 *Protein composition of the apoplast is altered during endophyte associations*

311

312 The results of the ABPP experiment showing reduced activity of apoplastic PLCPs in *L.*  
313 *perenne* plants infected with the endophyte *E. festucae* and the large variation observed  
314 in the loading controls indicate that the host apoplastic proteome is significantly altered  
315 during endophyte associations. To identify changes in the proteome induced by *E.*  
316 *festucae* infection, apoplastic fluids of infected and uninfected plants were isolated.  
317 Quantitative apoplast proteome analysis using stable isotope labelling by reductive  
318 dimethylation identified 1153 protein groups, of which 1092 proteins originated from *L.*  
319 *perenne* and 86 from *E. festucae* (Suppl. Dataset S3). Of these, 572 (CT/mock) and 550  
320 (FI1/mock) proteins were quantified in at least 2 biological replicates for the CT/mock  
321 and FI1/mock proteomes, respectively. Among the proteins quantified in response to  
322 CT, 552 belonged to *L. perenne* and 20 to *E. festucae* whereas in response to FI1, 530  
323 quantifiable proteins originated from *L. perenne* and the same 20 for *E. festucae* (Suppl.  
324 Dataset S3). Protein abundance differed depending on the endophyte inoculation.  
325 Compared to mock samples, FI1 infected plants showed stronger changes in proteome  
326 composition than CT infected plants (Fig. 3A). These differences in proteome  
327 composition could be explained by the biomass variation in colonised tissue previously  
328 described for FI1 in comparison to CT. Previous analyses have shown that FI1  
329 represents 1–2% of total biomass in infected *L. perenne* plants (Young *et al.*, 2005)  
330 whereas the biomass colonization of CT is estimated to approximately 0.2 % of leaf  
331 tissue in sheath (Tan *et al.*, 2001). Notably, 51 plant proteases were identified in the  
332 apoplastic proteome, including 7 aspartic proteases, 21 serine hydrolases, 9 cysteine  
333 proteases and 14 proteases belonging to other classes mostly metallo-peptidases (Fig.  
334 3B and Suppl. Dataset S3). Twenty-four of these plant proteases were quantified for the  
335 FI1/mock proteome. The cysteine protease, R\_8459, a SAG12-like PLCP, was  
336 significantly reduced in the FI1-infected proteome compared to mock. In contrast, two

337 plant serine proteases, R\_2759, an alpha/beta serine hydrolase of the peptidase S28  
338 family and R\_14255, a serine carboxypeptidase of the peptidase S10 family were  
339 significantly more abundant in response to FI1 infection (Fig. 3C, left panel). Twenty-five  
340 plant apoplastic proteases were quantified in the CT/mock proteome although no  
341 significant reduction in their abundance was observed in response to CT infection.  
342 Notably, three proteases showed a significant accumulation: the same R\_2759 and  
343 R\_14255 serine proteases also found with higher abundance in response to FI1 and  
344 R\_3647, an aspartic protease with C-terminal homology to a xylanase inhibitor (Fig. 3C,  
345 right panel).

346

#### 347 *Identification of active PLCPs in the L. perenne apoplast*

348

349 Our ABPP experiment showed that uninfected *L. perenne* plants, likely resembling *L.*  
350 *perenne* in its natural environment, maintain active PLCPs possibly to assist the  
351 proteolytic activity during diverse biological processes such as development,  
352 senescence, abiotic stresses and also as a response against pathogen attack. To  
353 further characterize and identify active PLCPs in the apoplast of *L. perenne* a pull-down  
354 of active PLCPs was performed using the activity-based probe DCG-04 (Greenbaum *et*  
355 *al.*, 2000). Apoplastic fluid of uninfected (E-) leaves was isolated and labelled with DCG-  
356 04. Biotinylated proteins were affinity purified using streptavidin beads and subjected to  
357 an on-bead digest (OBD) followed by mass spectrometry analysis. As a background  
358 control a no-probe-control proteome was equally treated with streptavidin beads. To  
359 confirm a successful affinity purification, proteins were boiled from the beads and  
360 examined by western blot analysis using streptavidin-HRP antibody. Two main signals  
361 between 25 and 35 kDa were observed representing PLCP labelling (Fig. 4A). MS  
362 analysis identified four active PLCPs present in *L. perenne* apoplast: R\_11872  
363 (LpCathB, CTB3 subfamily IX), R\_2516 (LpCP1, RD21 subfamily I), R\_4870 (LpCP2,  
364 AALP subfamily VIII) and R\_182 (LpXCP2, XCP2 subfamily III) (Suppl. Dataset S3).  
365 LpCathB and LpCp1 are the most abundant PLCPs followed by LpCP2 and LpXCP2,  
366 estimated by their LFQ intensities (Fig. 4B; suppl. Dataset S3). All four active PLCPs  
367 found in the apoplast of *L. perenne* belong to different subfamilies and share the same

368 domain structures containing a signal peptide, pro-domain and mature protease with the  
369 catalytic triad Cys, His and Asn. LpCP1 additionally contains a proline-rich repeat and a  
370 granulin domain (Fig. 4B). Interestingly, the PLCP SAG12 (R\_8459) which was found to  
371 be significantly less abundant in the FI1 sample (Fig. 3C) was not identified as an active  
372 PLCP in the mock sample suggesting that the loss of activity observed for the FI1  
373 treated samples in the ABPP experiment correspond to the active PLCPs LpCP1,  
374 LpXCP2, LpCP2 and LpCathB.

375

376 *A cysteine protease inhibitor is present in the apoplast of FI1 infected leaves*

377

378 Since apoplastic PLCP activity but not the abundance of the majority of cysteine  
379 proteases was strongly reduced in response to *E. festucae* infection (Fig.1, 3C), we  
380 hypothesized that inhibitor molecules modulate PLCPs during endophytic *E. festucae*  
381 colonization. To test this assumption, a convolution ABPP was performed. Two  
382 apoplastic fluids (E- and E+) were combined prior to labelling with the activity-based  
383 probe (BL). If one of the apoplastic fluids (E+) contains a PLCP inhibitor in excess, the  
384 inhibitor will suppress active PLCPs present in the other apoplastic fluid (E-). To ensure  
385 that a reduction in PLCP activity is not caused by dilution, the two apoplastic fluids were  
386 also mixed after labelling (AL). Thus, monitored PLCP activity should be an average of  
387 the individual PLCP activities, when combined after labelling. A reduction of protease  
388 activity in BL compared to AL would indicate the presence of excess inhibitor in one of  
389 the apoplastic fluids (Fig. 5A; Chandrasekar *et al.*, 2017). The convolution experiment  
390 was performed with MV202 labelled E- and E+ apoplastic fluids. E-64 pre-incubated  
391 samples served as control to ensure that observed signals were specific to the MV202  
392 labelling and corresponded to PLCPs. The convolution ABPP revealed that combining  
393 mock (E-) and infected (E+) apoplastic fluid before labelling (BL) caused a stronger  
394 reduction in PLCP activity compared to the combination after labelling (AL; Fig. 5B).  
395 Notably, a strong signal at ca. 35 kDa was observed in the SyproRuby gel for the E+  
396 sample. We hypothesized that this signal could represent the stabilization of PLCPs by  
397 an inhibitor. Fluorescent signal quantification of three biological experiments was  
398 performed and confirmed that the PLCP activity of BL was halved compared to AL (Fig.

399 5C), indicating that reduction in PLCP activity in response to *E. festucae* interaction is  
400 caused by an apoplastic PLCP inhibitor.

401

#### 402 *Mining the apoplastic proteome for potential PLCP inhibitors*

403

404 To investigate if the potential apoplastic PLCP inhibitor is of endophyte origin, we  
405 screened the *E. festucae* FI1 genome for orthologues of the known plant pathogen -  
406 derived PLCP inhibitors Avr2 (*Passalora fulva*), EpiC1 and Avrblb2 (*Phytophthora*  
407 *infestans*), VAP1 (*Globodera rostochiensis*), Pit2 (*Ustilago maydis*), popP2 (*Ralstonia*  
408 *solanacearum*), SDE1 (*Candidatus Liberibacter asiaticus*) and Cip1 (*Pseudomonas*  
409 *syringae* pv. tomato DC3000) (Suppl. Table S4). A blastp analysis revealed two  
410 potential VAP1 orthologs, FI1\_004109 and FI1\_007387 with 20.1% and 12.04% identity  
411 to GrVAP1, respectively. These two candidates were the only hits displaying E-values  
412 with significant homology (Suppl. Table S4). In a second, unbiased, approach our  
413 generated apoplastic proteome dataset was screened for the presence of FI1 *E.*  
414 *festucae* proteins. This approach identified 86 FI1 proteins of which 22 did not show  
415 homology to a known PFAM domain and represent proteins with unknown function. Of  
416 those 86, twenty proteins could be quantified since they were present in at least two  
417 biological replicates. A functional annotation using InterProScan  
418 ([www.ebi.ac.uk/interpro](http://www.ebi.ac.uk/interpro)), prediction tools for secretion signal (apoplastP 1.0,  
419 <http://apoplastp.csiro.au>) and a prediction of a virulence function (EffectorP 1.0,  
420 <http://effectorp.csiro.au>) was performed (Suppl. Dataset S3). From those FI1 quantified  
421 proteins only one, FI1\_003471, was predicted as an effector with apoplastic localization  
422 which is more abundant in CT samples than in FI1 samples (Suppl. Table S5 and suppl.  
423 Dataset S3). From the 66 non-quantified proteins, 17 were of unknown function and  
424 therefore functionally annotated as previously described (Suppl. Table S5). FI1\_002869,  
425 FI1\_003333 and FI1\_005240 were predicted as putative apoplastic effectors. None of  
426 the identified apoplastic *E. festucae* FI1 proteins showed homology to any cysteine  
427 protease inhibitor and the two orthologues of VAP1 were not found in our generated  
428 proteome dataset.



429           Since our analysis of the apoplastic proteome did not identify *E. festucae* effector  
430 candidates with significant similarity to known PLCP-inhibitors, we screened the  
431 apoplastic proteome dataset for potential PLCP inhibitors from the host plant. Seven  
432 putative cysteine and serine protease inhibitors of plant origin were identified: three  
433 cystatins R\_12141, R\_2071 and R\_27228 and four serine-type peptidase inhibitors  
434 (Table 1). Of these, one cystatin (R\_12141) was accurately quantified in two of the three  
435 experiments and did not show a significant difference in abundance between endophyte  
436 (F11 or CT) and mock inoculated samples (Suppl. Dataset S3). A phylogenetic analysis  
437 using plant cystatins from *A. thaliana* (Arabidopsis), *H. vulgare* (barley), *Z. mays* (maize)  
438 and *O. sativa* (rice) as the chicken (*Gallus gallus*) egg white cystatin (CEWC) showed  
439 three main clusters: cluster I represents only monocot cystatins, cluster II with four  
440 Arabidopsis members and representative cystatins of different monocots and cluster III  
441 with representative sequence homologues of AtCYS-2. R\_12141 and R\_2071 belonged  
442 to cluster III whereas R\_27228 grouped to the monocot cluster I (Fig. 6). The closest  
443 homologue of R\_12141 is HvCPI2, which is involved in barley defence against  
444 *Magnaporthe oryzae* (Velasco-Arroyo *et al.*, 2018). R\_12141 also clustered with the *A.*  
445 *thaliana* cystatin AtCys-1 and the maize cystatin CC1, and therefore this protein  
446 sequence was named LpCys1. For R\_2071 the closest homologue is the barley cystatin  
447 HvCPI4 and AtCys-6. Considering the close phylogeny proximity of R\_27228 to the  
448 maize cystatin CC9 we have named this sequence LpCys9 (Fig. 6). In summary, in our  
449 proteome dataset we could not identify apoplastic proteins from *E. festucae* with  
450 annotated function as protease inhibitors. Nevertheless, we have identified three plant  
451 cystatins present in the apoplast of infected samples which could be manipulated by *E.*  
452 *festucae* to inhibit plant PLCPs thus promoting infection and a successful colonization.

453

#### 454 *The L. perenne cystatin LpCys1 inhibits LpCP2*

455

456 To further study the role of *L. perenne* cystatins in the inhibition of plant PLCPs we  
457 selected LpCys1 since it was the only reliably quantified cystatin in our apoplast  
458 proteome. LpCys1 is closely related to the barley cystatin HvCPI2, which has been  
459 shown to strongly inhibit the barley PLCPs HvPap-6 and HvPap-10 (Martinez *et al.*,

2009). GST-tagged LpCys1 was expressed in *E. coli* and purified by affinity chromatography followed by gel filtration. Purified LpCys1 was tested for its inhibitory capacity on the four apoplastic *L. perenne* PLCPs: LpCP1, LpCP2, LpXCP2 and LpCathB which were heterologous expressed in *N. benthamiana* leaves using *Agrobacterium* transient transformation. PLCP activity was determined from *N. benthamiana* apoplastic fluids containing the PLCPs using the activity based probe MV201 (Richau *et al.*, 2012). A concentration range (0 to 4.5  $\mu$ M) of purified LpCys1 was used for inhibition assays with the four PLCPs. Commercially available chicken cystatin (CEWC) was used as a positive control. Three controls were used in this ABPP experiment: E-64 to test for the specificity of MV201 signals, *N. benthamiana* expressed CP1A<sup>mut</sup> (a catalytic inactive maize PLCP, Schulze Hüynck *et al.*, 2019), as negative control for the PLCP background in *N. benthamiana* apoplastic fluids and a no-probe control (NPC), to detect unspecific fluorescent background. The activity of LpCP1 increased with low concentrations of LpCys1, reaching a maximal peak at ca. 2.5  $\mu$ M of incubation with the cystatin. With cystatin concentrations greater than 2.5  $\mu$ M the activity of LpCP1 decreases in a concentration dependent manner (Fig. 7A, B). SyproRuby staining showed a band at ca. 26 kDa, likely representing LpCP1, which increases in intensity until the addition of ca. 2.5  $\mu$ M LpCys1 but continues stable with increasing concentrations of the cystatin (Fig. 7A). Notably, signal quantification from four biological replicates confirmed a six-fold increase of LpCP1 activity after incubation with 2.5  $\mu$ M LpCys1 and further increasingly concentrations of the cystatin decreases LpCP1 activity (Fig. 7B). In contrast, CEWC showed a strong inhibition against LpCP1 already at 0.5  $\mu$ M (Fig. 7B and suppl. Fig. S2). In case of LpCP2, LpCys1 showed a concentration dependent inhibitory effect, resulting in complete inactivation of the protease already at 3  $\mu$ M LpCys1 (Fig. 7C). Inhibition of LpCP2 was also observed by CEWC, although with a much weaker inhibitory capacity than LpCys1 (Fig. 7D & Suppl. Fig. S2). LpXCP2 was poorly inhibited by both, LpCys1 and CC, and ca. 50% of the inhibition was reached with 4.5  $\mu$ M, the maximum tested concentration for both inhibitors, suggesting that LpCys1 has a poor affinity towards LpXCP2 (Fig. 7E-F and Suppl. Fig. S2). Finally, LpCys1 did not inhibit LpCathB although CEWC showed a concentration dependent inhibitory effect suggesting that LpCathB might not be a target

491 for LpCys1 (Fig. 7G-H & Suppl. Fig. S2). These results suggest that LpCys1 has a  
492 stronger inhibitory capacity against LpCP2 than towards other PLCPs. Thus, LpCys1 is  
493 a potent and specific inhibitor of LpCP2 that might contribute to the general reduction of  
494 apoplastic PLCP activity during *E. festucae* colonization. However, since only one out of  
495 four active proteases is sensitive to this cystatin, it is likely that additional inhibitors are  
496 involved in PLCP inactivation during this fungal interaction.

497

## 498 **Discussion**

499

500 In this study we have shown that apoplastic papain-like cysteine proteases are inhibited  
501 during endophytic colonisation of the *L. perenne* ryegrass, similar to pathogen  
502 colonisation. We identified the PLCPs LpCP1, LpCP2, LpXCP2 and LpCathB being  
503 active in the apoplast of uninfected *L. perenne* plants. Interestingly, these PLCPs  
504 classify into different PLCP subfamilies, known to be hubs in plant immunity (Misas  
505 Villamil *et al.*, 2016). The most abundant of the four active apoplastic PLCPs in  
506 uninfected *L. perenne* leaves was LpCathB. In both, *N. benthamiana* and *A. thaliana*  
507 homologues of LpCathB are involved in the hypersensitive response triggered by  
508 bacterial avirulent pathogens (Gilroy *et al.*, 2007; McLellan *et al.*, 2009; Ge *et al.*, 2016)  
509 although it might not function as a universal regulator of the hypersensitive response  
510 (Thomas and van der Hoorn, 2018). The second most abundant active apoplastic PLCP  
511 was LpCP1, followed by LpCP2 and LpXCP2. All three proteases have orthologues in  
512 maize which were found to be activated in the apoplast after salicylic acid treatment and  
513 are involved in the defence response against the biotrophic fungus *U. maydis* (van der  
514 Linde *et al.*, 2012a; Mueller *et al.*, 2013). Maize CP1 and CP2 apoplastic proteases are  
515 targeted and inhibited by the *U. maydis* effector Pit2 which acts as a substrate mimic  
516 molecule to achieve a successful inhibition (Mueller *et al.*, 2013; Misas Villamil *et al.*,  
517 2019). LpCP1 belongs to the RD21-like subfamily (I) and contains a granulin domain,  
518 which is exclusively found in members of subfamily I or IV (Richau *et al.*, 2012; Misas  
519 Villamil *et al.*, 2016). Members of this subfamily have been described to play a crucial  
520 role during pathogen attack. The tomato C14 protease is inhibited during *Phytophthora*  
521 *infestans* infection by the cystatin-like effector proteins EpiC1 and EpiC2B (Kaschani *et*

522 *et al.*, 2010) and by the chagasin-like Cip1 inhibitor during *Pseudomonas* infection (Shindo  
523 *et al.*, 2016). Additionally, the RxLR effector of *P. infestans* targets C14 to prevent its  
524 secretion into the apoplast (Bozkurt *et al.*, 2011). Moreover, in barley, which is  
525 phylogenetically closely related to ryegrass, HvPap-6 accumulated after *Magnaporthe*  
526 *oryzae* treatment, particularly at late stages of infection and after infestation with the  
527 mite *Tetranychus urticae* where mostly the pre-mature form of HvPap-6 accumulated  
528 (Diaz-Mendoza *et al.*, 2017). LpCP2 belongs to the AALP-like subfamily (VIII) and like  
529 its closest homologue in barley, the thiol protease aleurain Hv-Pap12, LpCP2 is also  
530 present and active in barley leaf extracts (Frank *et al.*, 2019). Similar to LpCP1  
531 subfamily members, LpCP2 orthologues play a role in defence against different  
532 pathogens. Silencing of CYP1/2 in *N benthamiana* increases susceptibility against  
533 *Colletotrichum destructivum* (Hao *et al.*, 2006). In maize, CP1 and CP2 have been  
534 shown to function in the release of Zip1, a peptide signalling molecule that activates  
535 salicylic acid immune responses (Ziemann *et al.*, 2018). Together, this body of evidence  
536 indicate that members related to these PLCP subfamilies need to be shut-down by  
537 pathogens to avoid activation of plant immunity.

538 Do endophytes need to apply similar strategies on modulation of PLCPs as  
539 pathogens? In *E. festucae* F11 and CT infected *L. perenne* plants the abundance of  
540 PLCPs did not significantly differ from mock plants, although PLCP activity was almost  
541 fully diminished, indicating that the reduction in PLCP activity is caused via inhibition  
542 rather than protein degradation. Based on the results presented here, we speculate two  
543 ways of inhibition: the putative inhibitor could be of plant origin, manipulated by *E.*  
544 *festucae* to achieve a successful colonization, or of fungal origin, a secreted effector  
545 molecule. An example of an inhibitor of plant origin is the cystatin CC9 which was  
546 identified as an important compatibility factor in the maize – *U. maydis* interaction. Upon  
547 *U. maydis* infection *cc9* expression is induced and CC9 suppresses plant immunity via  
548 PLCP inhibition, thus enabling *U. maydis* colonization (van der Linde *et al.*, 2012a). CC9  
549 inhibits all apoplastic PLCPs and is required for early stages of *U. maydis* colonization  
550 since at later stages of infection the Pit2 inhibitor likely takes over as a more specific  
551 inhibitor of the apoplastic proteases CP1 and CP2 (van der Linde *et al.*, 2012a; Misas  
552 Villamil *et al.*, 2019). Interestingly, the mechanism of inhibition of CP1 and CP2 by *U.*

553 *maydis* Pit2 resembles the “activation – inhibition” of LpCys1 towards LpCP1 and  
554 LpCP2. Whilst in maize CP2 is inhibited by Pit2, CP1 is first stabilized leading to an  
555 increased CP1 activity and eventually, at higher concentrations of Pit2, to inhibition  
556 (Misas Villamil *et al.*, 2019). In case of the *L. perenne* – *E. festucae* interaction, LpCys1  
557 did not efficiently inhibit LpCP1 but rather activates it, contrary to LpCP2 where LpCys1  
558 achieves a full inhibition. These results suggest that LpCys1 is likely stabilizing LpCP1  
559 until the batch of available zymogen has been consumed and the inhibition can then  
560 take place in a concentration dependent manner.

561 LpXCP2 and LpCathB are not inhibited by the cystatin LpCys1. These results  
562 indicate that another inhibitor besides LpCys1 is involved in the PLCP inhibition in  
563 response to *E. festucae* interaction. CC9 is not the closest orthologue of LpCys1 but of  
564 LpCys9 which might therefore represent an interesting candidate for ryegrass PLCP  
565 inhibition. If LpCys9 expression is similarly to CC9, one could speculate that it might be  
566 transiently activated at early stages of infection. In this study we did not examine early  
567 stages of infection which might be reflected in the innermost leaf blade of the  
568 pseudostem tissue (Schmid *et al.*, 2016), nevertheless a strong PLCP inhibition was  
569 observed during endophytic interactions indicating the production of a PLCP inhibitor  
570 also in a long term systemic host colonization. These findings confirm that endophyte  
571 infections of *L. perenne* lead to major alterations of the host metabolism, development  
572 and apoplastic proteome (Scott *et al.*, 2018; Green *et al.*, 2020).

573 The presence of LpCys1 in the apoplast could have an alternative function  
574 unrelated to the inhibition of PLCPs. In barley, the HvCPI-2 cystatin, the closest  
575 orthologue to LpCys1, showed a strong fungicide effect against *Botrytis cinerea* and  
576 *Fusarium oxysporum* mycelia (Abraham *et al.*, 2006), suggesting that the presence of  
577 LpCys1 could be part of the plant immune response against *E. festucae*, rather than  
578 LpCys1 being manipulated by *E. festucae* to facilitate PLCP inhibition. Indeed, one of  
579 the most highly expressed fungal genes *in planta* is a chitinase (Eaton *et al.*, 2010),  
580 suggesting host defence responses are activated and *E. festucae* evades plant  
581 immunity by altering or masking the chitin composition of hyphae *in planta* (Becker *et*  
582 *al.*, 2016).

583           Based on our results it is possible that the inhibition of ryegrass PLCPs during  
584 mutualistic interactions is the result of a cooperative effect of plant cystatins and a  
585 secreted effector from *E. festucae*. We have identified four putative effector candidates  
586 present in our apoplast analysis and two VAP-1 orthologues that could potentially inhibit  
587 *L. perenne* PLCPs. Both *E. festucae* VAP1- like proteins match to an allergen V5/SCP  
588 domain containing protein of *Claviceps purpurea* and *Moelleriella libera* based on the  
589 uniprot database ([www.uniprot.org](http://www.uniprot.org)). F11\_004109 also has a ‘hit’ with a basic form of  
590 pathogenesis protein 1 of *Pochonia clamydospora*. Notably, all best ‘hits’ correspond to  
591 proteins restricted to the order Hypocreales (*Claviceps spp.*, *Metarhizium spp.*,  
592 *Pochonia spp.*, *Moelleriella spp.*, *Ustilaginoiea spp.*) suggesting that both *E. festucae*  
593 identified VAP1 orthologues might be ubiquitous proteins of the family Clavicipitaceae  
594 and not specific effectors from *E. festucae*. Notably, common features can be found for  
595 cystatins such as the Q-V-G motif (Gln-Xaa-Val-Xaa-Gly), a Pro -Trp or Leu -Trp  
596 dipeptide motif in the C-terminal region and a conserved Gly residue in the N-terminal  
597 region (Benchabane *et al.*, 2010). These common features are not found in pathogen –  
598 derived PLCP inhibitors suggesting that pathogens evolve independent strategies to  
599 suppress protease activity making challenging bioinformatic searches of this type of  
600 effector molecules. Whether the new potential *E. festucae* effector candidates contribute  
601 to the full inhibition during F11 interactions remains to be elucidated.

602           In summary, we have shown that during the *L. perenne* – *E. festucae* interaction,  
603 microbial endophytes modulate essential components of the plant immune system,  
604 similar to pathogenic interactions. In this case, the inhibition of apoplastic cysteine  
605 proteases might be essential and required for *E. festucae* to maintain a mutualistic  
606 interaction with its host.

607

608

## 609 **Figure legends**

610 Fig. 1. Activity of apoplastic PLCPs in *Epichloë festucae* infected *Lolium perenne*  
611 leaves.

612 Fig. 2. Phylogeny and subfamily classification of *L. perenne* PLCPs.

613 Fig. 3. Apoplast proteome analysis of FI1 and CT infected and mock-treated leaves.

614 Fig. 4. Identification of *L. perenne* active apoplastic PLCPs.

615 Fig. 5. An apoplastic PLCP inhibitor is present in *E. festucae* infected plants.

616 Fig. 6. Phylogentic analysis of identified cystatins from *L. perenne*.

617 Fig. 7. Inhibitory activity of LpCys1 on overexpressed ryegrass PLCPs.

618

## 619 **Supplementary data**

620 Table S1: oligonucleotides

621 Table S2: strains

622 Table S3: original identifiers of *L. perenne*

623 Table S4: Functional annotation of “unknown” FI1 apoplastic proteins

624 Table S5: screen of PLCP-inhibitor orthologs in *E. festucae* FI1 strain

625 Fig. S1: Phylogenetic tree of *L. perenne* PLCPs

626 Fig. S2: Concentration range of the inhibition of *L. perenne* PLCPs by CEWC

627 Dataset S1: sequences used for PLCP phylogenetic analysis

628 Dataset S2: sequences used for cystatin phylogenetic analysis

629 Dataset S3: apoplastic proteomics, annotation and functional analysis

630

## 631 **Acknowledgements**

632 We would like to thank Yvonne Becker for providing the infected plants, for reading the  
633 manuscript and for giving us helpful comments and suggestions. We also thank Hermen  
634 Overkleeft (Leiden University) for kindly providing us with the ABPs. Many thanks to Ute  
635 Meyer for fruitful discussions and technical support. Also, thanks to David Winter  
636 (Massey University) for providing the *E. festucae* FI1 protein dataset. Work in the Scott

637 laboratory was supported by a grant (RM19009) from the Tertiary Education  
638 Commission to the Bio-Protection Research Centre, B.S. was supported by an  
639 Alexander von Humboldt Research Award.

#### 640 **Author contributions**

641 A.P. and J.C.M.V. wrote the manuscript with input from all authors. G.D., J.C.M.V., B.S.,  
642 P.F.H and A.P. designed the experiments. A.P., K.G, and J.C.M.V. performed the  
643 biochemical characterization of ryegrass PLCPs. J.R.L.D and A.P. made the  
644 bioinformatic and phylogenetic analyses of plant PLCPs and cystatins. F.D. and P.F.H.  
645 performed and analysed the mass spectrometry experiments.

#### 646 **Data availability statement**

647 All data supporting the findings of this study are available within the paper and within its  
648 supplementary materials published online. All MS-based proteomics data have been  
649 deposited to the ProteomeXchange Consortium via the PRIDE (Perez-Riverol *et al.*,  
650 2019) partner repository with the identifiers PXD022007 (reviewer login:  
651 [reviewer\\_pxd022007@ebi.ac.uk](mailto:reviewer_pxd022007@ebi.ac.uk), password: ECUnxNOH) for the ABPP dataset and  
652 PXD022009 (reviewer login: [reviewer\\_pxd022009@ebi.ac.uk](mailto:reviewer_pxd022009@ebi.ac.uk), password: zQhfJ1pi) for  
653 the apoplast proteome dataset.



654 **References**

- 655 **Abraham Z, Martinez M, Carbonero P, Diaz I.** 2006. Structural and functional diversity within  
656 the cystatin gene family of *Hordeum vulgare*. *Journal of Experimental Botany* **57**, 4245–4255.
- 657 **Becker M, Becker Y, Green K, Scott B.** 2016. The endophytic symbiont *Epichloë festucae*  
658 establishes an epiphyllous net on the surface of *Lolium perenne* leaves by development of an  
659 expressorium, an appressorium-like leaf exit structure. *The New Phytologist* **211**, 240–254.
- 660 **Becker Y, Eaton CJ, Brasell E, May KJ, Becker M, Hassing B, Cartwright GM, Reinhold L, Scott B.**  
661 2015. The Fungal Cell-Wall Integrity MAPK Cascade Is Crucial for Hyphal Network Formation and  
662 Maintenance of Restrictive Growth of *Epichloë festucae* in Symbiosis With *Lolium perenne*.  
663 *Molecular plant-microbe interactions: MPMI* **28**, 69–85.
- 664 **Benchabane M, Schlüter U, Vorster J, Goulet M-C, Michaud D.** 2010. Plant cystatins. *Biochimie*  
665 **92**, 1657–1666.
- 666 **Boersema PJ, Raijmakers R, Lemeer S, Mohammed S, Heck AJR.** 2009. Multiplex peptide stable  
667 isotope dimethyl labeling for quantitative proteomics. *Nature Protocols* **4**, 484–494.
- 668 **Bozkurt TO, Schornack S, Win J, et al.** 2011. *Phytophthora infestans* effector AVRblb2 prevents  
669 secretion of a plant immune protease at the haustorial interface. *Proceedings of the National*  
670 *Academy of Sciences* **108**, 20832–20837.
- 671 **Byrne SL, Nagy I, Pfeifer M, et al.** 2015. A synteny-based draft genome sequence of the forage  
672 grass *Lolium perenne*. *The Plant Journal: For Cell and Molecular Biology* **84**, 816–826.
- 673 **Chandrasekar B, Hong TN, van der Hoorn RAL.** 2017. Inhibitor Discovery by Convolution ABPP.  
674 *Methods in Molecular Biology (Clifton, N.J.)* **1491**, 47–56.
- 675 **Clark K, Franco JY, Schwizer S, et al.** 2018. An effector from the Huanglongbing-associated  
676 pathogen targets citrus proteases. *Nature Communications* **9**, 1718.
- 677 **Díaz-Mendoza M, Velasco-Arroyo B, González-Melendi P, Martínez M, Díaz I.** 2014. C1A  
678 cysteine protease-cystatin interactions in leaf senescence. *Journal of Experimental Botany* **65**,  
679 3825–3833.
- 680 **Díaz-Mendoza M, Velasco-Arroyo B, Santamaria ME, Diaz I, Martinez M.** 2017. HvPap-1 C1A  
681 Protease Participates Differentially in the Barley Response to a Pathogen and an Herbivore.  
682 *Frontiers in Plant Science* **8**.
- 683 **Dupont P-Y, Eaton CJ, Wargent JJ, Fechtner S, Solomon P, Schmid J, Day RC, Scott B, Cox MP.**  
684 2015. Fungal endophyte infection of ryegrass reprograms host metabolism and alters  
685 development. *New Phytologist* **208**, 1227–1240.

- 686 **Eaton CJ, Cox MP, Ambrose B, Becker M, Hesse U, Schardl CL, Scott B.** 2010. Disruption of  
687 signaling in a fungal-grass symbiosis leads to pathogenesis. *Plant Physiology* **153**, 1780–1794.
- 688 **Eaton CJ, Cox MP, Scott B.** 2011. What triggers grass endophytes to switch from mutualism to  
689 pathogenism? *Plant Science* **180**, 190–195.
- 690 **Frank S, Hollmann J, Mulisch M, Matros A, Carrión CC, Mock H-P, Hensel G, Krupinska K.** 2019.  
691 Barley cysteine protease PAP14 plays a role in degradation of chloroplast proteins. *Journal of*  
692 *Experimental Botany* **70**, 6057–6069.
- 693 **Ge Y, Cai Y-M, Bonneau L, Rotari V, Danon A, McKenzie EA, McLellan H, Mach L, Gallois P.**  
694 2016. Inhibition of cathepsin B by caspase-3 inhibitors blocks programmed cell death in  
695 Arabidopsis. *Cell Death and Differentiation* **23**, 1493–1501.
- 696 **Gilroy EM, Hein I, van der Hoorn R, et al.** 2007. Involvement of cathepsin B in the plant disease  
697 resistance hypersensitive response. *The Plant Journal: For Cell and Molecular Biology* **52**, 1–13.
- 698 **Green KA, Berry D, Feussner K, Eaton CJ, Ram A, Mesarich CH, Solomon P, Feussner I, Scott B.**  
699 2020. *Lolium perenne* apoplast metabolomics for identification of novel metabolites produced  
700 by the symbiotic fungus *Epichloë festucae*. *New Phytologist* **227**, 559–571.
- 701 **Greenbaum D, Medzihradzky KF, Burlingame A, Bogyo M.** 2000. Epoxide electrophiles as  
702 activity-dependent cysteine protease profiling and discovery tools. *Chemistry & Biology* **7**, 569–  
703 581.
- 704 **Hao L, Hsiang T, Goodwin PH.** 2006. Role of two cysteine proteinases in the susceptible  
705 response of *Nicotiana benthamiana* to *Colletotrichum destructivum* and the hypersensitive  
706 response to *Pseudomonas syringae* pv. tomato. *Plant Science* **170**, 1001–1009.
- 707 **Hassing B, Winter D, Becker Y, Mesarich CH, Eaton CJ, Scott B.** 2019. Analysis of *Epichloë*  
708 *festucae* small secreted proteins in the interaction with *Lolium perenne*. *PLoS ONE* **14**.
- 709 **Kaschani F, Shabab M, Bozkurt T, Shindo T, Schornack S, Gu C, Ilyas M, Win J, Kamoun S, van**  
710 **der Hoorn RAL.** 2010. An Effector-Targeted Protease Contributes to Defense against  
711 *Phytophthora infestans* and Is under Diversifying Selection in Natural Hosts1[W]. *Plant*  
712 *Physiology* **154**, 1794–1804.
- 713 **Katoh K, Standley DM.** 2013. MAFFT multiple sequence alignment software version 7:  
714 improvements in performance and usability. *Molecular Biology and Evolution* **30**, 772–780.
- 715 **Kloppholz S, Kuhn H, Requena N.** 2011. A Secreted Fungal Effector of *Glomus intraradices*  
716 Promotes Symbiotic Biotrophy. *Current Biology* **21**, 1204–1209.
- 717 **Kourelis J, Malik S, Mattinson O, Krauter S, Kahlon PS, Paulus JK, van der Hoorn RAL.** 2020.  
718 Evolution of a guarded decoy protease and its receptor in solanaceous plants. *Nature*  
719 *Communications* **11**, 4393.

- 720 **Krüger J, Thomas CM, Golstein C, Dixon MS, Smoker M, Tang S, Mulder L, Jones JDG.** 2002. A  
721 Tomato Cysteine Protease Required for Cf-2-Dependent Disease Resistance and Suppression of  
722 Autonecrosis. *Science* **296**, 744–747.
- 723 **Leuchtmann A, Schardl CL, Siegel MR.** 1994. Sexual compatibility and taxonomy of a new  
724 species of *Epichloë* symbiotic with fine fescue grasses. *Mycologia* **86**, 802–812.
- 725 **van der Linde K, Hemetsberger C, Kastner C, Kaschani F, van der Hoorn RAL, Kumlehn J,**  
726 **Doehlemann G.** 2012*a*. A maize cystatin suppresses host immunity by inhibiting apoplastic  
727 cysteine proteases. *The Plant Cell* **24**, 1285–1300.
- 728 **van der Linde K, Mueller AN, Hemetsberger C, Kashani F, van der Hoorn RAL, Doehlemann G.**  
729 2012*b*. The maize cystatin CC9 interacts with apoplastic cysteine proteases. *Plant Signaling &*  
730 *Behavior* **7**, 1397–1401.
- 731 **Lozano-Torres JL, Wilbers RHP, Gawronski P, et al.** 2012. Dual disease resistance mediated by  
732 the immune receptor Cf-2 in tomato requires a common virulence target of a fungus and a  
733 nematode. *Proceedings of the National Academy of Sciences of the United States of America*  
734 **109**, 10119–10124.
- 735 **M. J., Christensen, C. R., Voisey.** 2007. The biology of the endophyte/grass partnership. *New*  
736 *Zealand Grassland Association: Endophyte Symposium*, 123–133.
- 737 **Martinez M, Cambra I, Carrillo L, Diaz-Mendoza M, Diaz I.** 2009. Characterization of the entire  
738 cystatin gene family in barley and their target cathepsin L-like cysteine-proteases, partners in  
739 the hordein mobilization during seed germination. *Plant Physiology* **151**, 1531–1545.
- 740 **Martínez M, Cambra I, González-Melendi P, Santamaría ME, Díaz I.** 2012. C1A cysteine-  
741 proteases and their inhibitors in plants. *Physiologia Plantarum* **145**, 85–94.
- 742 **May KJ, Bryant MK, Zhang X, Ambrose B, Scott B.** 2008. Patterns of Expression of a Lolitrem  
743 Biosynthetic Gene in the *Epichloë festucae*–Perennial Ryegrass Symbiosis. *Molecular Plant-*  
744 *Microbe Interactions* **21**, 188–197.
- 745 **McLellan H, Gilroy EM, Yun B-W, Birch PRJ, Loake GJ.** 2009. Functional redundancy in the  
746 Arabidopsis Cathepsin B gene family contributes to basal defence, the hypersensitive response  
747 and senescence. *New Phytologist* **183**, 408–418.
- 748 **Misas Villamil JC, Mueller AN, Demir F, et al.** 2019. A fungal substrate mimicking molecule  
749 suppresses plant immunity via an inter-kingdom conserved motif. *Nature Communications* **10**,  
750 1576.
- 751 **Misas-Villamil JC, van der Hoorn RAL, Doehlemann G.** 2016. Papain-like cysteine proteases as  
752 hubs in plant immunity. *The New Phytologist* **212**, 902–907.

- 753 **Mueller AN, Ziemann S, Treitschke S, Aßmann D, Doehlemann G.** 2013. Compatibility in the  
754 *Ustilago maydis*–Maize Interaction Requires Inhibition of Host Cysteine Proteases by the Fungal  
755 Effector Pit2. *PLoS Pathogens* **9**.
- 756 **Nostadt R, Hilbert M, Nizam S, et al.** 2020. A secreted fungal histidine- and alanine-rich protein  
757 regulates metal ion homeostasis and oxidative stress. *New Phytologist* **227**, 1174–1188.
- 758 **Ökmen B, Kemmerich B, Hilbig D, Wemhöner R, Aschenbroich J, Perrar A, Huesgen PF,**  
759 **Schipper K, Doehlemann G.** 2018. Dual function of a secreted fungalysin metalloprotease in  
760 *Ustilago maydis*. *The New Phytologist* **220**, 249–261.
- 761 **Paulus JK, Kourelis J, Ramasubramanian S, et al.** 2020. Extracellular proteolytic cascade in  
762 tomato activates immune protease Rcr3. *Proceedings of the National Academy of Sciences of*  
763 *the United States of America* **117**, 17409–17417.
- 764 **Perez-Riverol Y, Csordas A, Bai J, et al.** 2019. The PRIDE database and related tools and  
765 resources in 2019: improving support for quantification data. *Nucleic Acids Research* **47**, D442–  
766 D450.
- 767 **Perotto S, Daghino S, Martino E.** 2018. Ericoid mycorrhizal fungi and their genomes: another  
768 side to the mycorrhizal symbiosis? *New Phytologist* **220**, 1141–1147.
- 769 **Plett JM, Daguerre Y, Wittulsky S, et al.** 2014. Effector MiSSP7 of the mutualistic fungus  
770 *Laccaria bicolor* stabilizes the Populus JAZ6 protein and represses jasmonic acid (JA) responsive  
771 genes. *Proceedings of the National Academy of Sciences of the United States of America* **111**,  
772 8299–8304.
- 773 **Plett JM, Kemppainen M, Kale SD, Kohler A, Legué V, Brun A, Tyler BM, Pardo AG, Martin F.**  
774 2011. A secreted effector protein of *Laccaria bicolor* is required for symbiosis development.  
775 *Current biology: CB* **21**, 1197–1203.
- 776 **Rawlings ND, Barrett AJ, Thomas PD, Huang X, Bateman A, Finn RD.** 2018. The MEROPS  
777 database of proteolytic enzymes, their substrates and inhibitors in 2017 and a comparison with  
778 peptidases in the PANTHER database. *Nucleic Acids Research* **46**, D624–D632.
- 779 **Richau KH, Kaschani F, Verdoes M, Pansuriya TC, Niessen S, Stüber K, Colby T, Overkleef HS,**  
780 **Bogyo M, Van der Hoorn RAL.** 2012. Subclassification and Biochemical Analysis of Plant Papain-  
781 Like Cysteine Proteases Displays Subfamily-Specific Characteristics1[C][W]. *Plant Physiology*  
782 **158**, 1583–1599.
- 783 **Ritchie ME, Phipson B, Wu D, Hu Y, Law CW, Shi W, Smyth GK.** 2015. Limma powers  
784 differential expression analyses for RNA-sequencing and microarray studies. *Nucleic Acids*  
785 *Research* **43**, e47.

- 786 **Rooney HCE, Van't Klooster JW, van der Hoorn RAL, Joosten MHAJ, Jones JDG, de Wit PJGM.**  
787 2005. *Cladosporium* Avr2 inhibits tomato Rcr3 protease required for Cf-2-dependent disease  
788 resistance. *Science* (New York, N.Y.) **308**, 1783–1786.
- 789 **Schardl CL, Leuchtman A, Spiering MJ.** 2004. Symbioses of grasses with seedborne fungal  
790 endophytes. *Annual Review of Plant Biology* **55**, 315–340.
- 791 **Schardl CL, Young CA, Hesse U, et al.** 2013. Plant-symbiotic fungi as chemical engineers: multi-  
792 genome analysis of the clavicipitaceae reveals dynamics of alkaloid loci. *PLoS genetics* **9**,  
793 e1003323.
- 794 **Schmid J, Day R, Zhang N, et al.** 2016. Host Tissue Environment Directs Activities of an *Epichloë*  
795 Endophyte, While It Induces Systemic Hormone and Defense Responses in Its Native Perennial  
796 Ryegrass Host. *Molecular Plant-Microbe Interactions*® **30**, 138–149.
- 797 **Schulze Hüynck J, Kaschani F, van der Linde K, Ziemann S, Müller AN, Colby T, Kaiser M, Misas**  
798 **Villamil JC, Doehlemann G.** 2019. Proteases Underground: Analysis of the Maize Root Apoplast  
799 Identifies Organ Specific Papain-Like Cysteine Protease Activity. *Frontiers in Plant Science* **10**.
- 800 **Scott B, Becker Y, Becker M, Cartwright G.** 2012. Morphogenesis, Growth, and Development of  
801 the Grass Symbiont *Epichloë festucae*. In: Pérez-Martín J,, In: Di Pietro A, eds. Morphogenesis  
802 and Pathogenicity in Fungi. Berlin, Heidelberg: Springer Berlin Heidelberg, 243–264.
- 803 **Scott B, Green K, Berry D.** 2018. The fine balance between mutualism and antagonism in the  
804 *Epichloë festucae*–grass symbiotic interaction. *Current Opinion in Plant Biology* **44**, 32–38.
- 805 **Sekhon RS, Sasaki C, Kumar R, et al.** 2019. Integrated Genome-Scale Analysis Identifies Novel  
806 Genes and Networks Underlying Senescence in Maize. *The Plant Cell* **31**, 1968–1989.
- 807 **Shindo T, Kaschani F, Yang F, et al.** 2016. Screen of Non-annotated Small Secreted Proteins of  
808 *Pseudomonas syringae* Reveals a Virulence Factor That Inhibits Tomato Immune Proteases.  
809 *PLoS Pathogens* **12**.
- 810 **Song J, Win J, Tian M, Schornack S, Kaschani F, Ilyas M, van der Hoorn RAL, Kamoun S.** 2009.  
811 Apoplastic effectors secreted by two unrelated eukaryotic plant pathogens target the tomato  
812 defense protease Rcr3. *Proceedings of the National Academy of Sciences of the United States of*  
813 *America* **106**, 1654–1659.
- 814 **Spanu PD, Panstruga R.** 2017. Editorial: Biotrophic Plant-Microbe Interactions. *Frontiers in*  
815 *Plant Science* **8**.
- 816 **Stamatakis A.** 2014. RAxML version 8: a tool for phylogenetic analysis and post-analysis of large  
817 phylogenies. *Bioinformatics* (Oxford, England) **30**, 1312–1313.
- 818 **Takemoto D, Kamakura S, Saikia S, Becker Y, Wrenn R, Tanaka A, Sumimoto H, Scott B.** 2011.  
819 Polarity proteins Bem1 and Cdc24 are components of the filamentous fungal NADPH oxidase

- 820 complex. Proceedings of the National Academy of Sciences of the United States of America **108**,  
821 2861–2866.
- 822 **Takemoto D, Tanaka A, Scott B.** 2006. A p67Phox-like regulator is recruited to control hyphal  
823 branching in a fungal-grass mutualistic symbiosis. The Plant Cell **18**, 2807–2821.
- 824 **Tan YY, Spiering MJ, Scott V, Lane GA, Christensen MJ, Schmid J.** 2001. In Planta Regulation of  
825 Extension of an Endophytic Fungus and Maintenance of High Metabolic Rates in Its Mycelium in  
826 the Absence of Apical Extension. Appl. Environ. Microbiol. **67**, 5377–5383.
- 827 **Tanaka A, Cartwright GM, Saikia S, Kayano Y, Takemoto D, Kato M, Tsuge T, Scott B.** 2013.  
828 ProA, a transcriptional regulator of fungal fruiting body development, regulates leaf hyphal  
829 network development in the *Epichloë festucae*-*Lolium perenne* symbiosis. Molecular  
830 Microbiology **90**, 551–568.
- 831 **Tanaka A, Christensen MJ, Takemoto D, Park P, Scott B.** 2006. Reactive oxygen species play a  
832 role in regulating a fungus-perennial ryegrass mutualistic interaction. The Plant Cell **18**, 1052–  
833 1066.
- 834 **Tanaka A, Takemoto D, Hyon G-S, Park P, Scott B.** 2008. NoxA activation by the small GTPase  
835 RacA is required to maintain a mutualistic symbiotic association between *Epichloë festucae* and  
836 perennial ryegrass. Molecular Microbiology **68**, 1165–1178.
- 837 **Thomas EL, van der Hoorn RAL.** 2018. Ten Prominent Host Proteases in Plant-Pathogen  
838 Interactions. International Journal of Molecular Sciences **19**.
- 839 **Tyanova S, Temu T, Cox J.** 2016. The MaxQuant computational platform for mass spectrometry  
840 – based shotgun proteomics. Nature Protocols **11**, 2301–2319.
- 841 **Velasco-Arroyo B, Martinez M, Diaz I, Diaz-Mendoza M.** 2018. Differential response of  
842 silencing HvIcy2 barley plants against *Magnaporthe oryzae* infection and light deprivation. BMC  
843 plant biology **18**, 337.
- 844 **Wawra S, Fesel P, Widmer H, et al.** 2016. The fungal-specific  $\beta$ -glucan-binding lectin FGB1  
845 alters cell-wall composition and suppresses glucan-triggered immunity in plants. Nature  
846 Communications **7**, 13188.
- 847 **Weber E, Engler C, Gruetzner R, Werner S, Marillonnet S.** 2011. A Modular Cloning System for  
848 Standardized Assembly of Multigene Constructs. PLoS ONE **6**.
- 849 **Young CA, Bryant MK, Christensen MJ, Tapper BA, Bryan GT, Scott B.** 2005. Molecular cloning  
850 and genetic analysis of a symbiosis-expressed gene cluster for lolitrem biosynthesis from a  
851 mutualistic endophyte of perennial ryegrass. Molecular genetics and genomics: MGG **274**, 13–  
852 29.

- 853 **Zamioudis C, Pieterse CMJ.** 2012. Modulation of host immunity by beneficial microbes.  
854 *Molecular plant-microbe interactions: MPMI* **25**, 139–150.
- 855 **Ziemann S, van der Linde K, Lahrmann U, *et al.*** 2018. An apoplastic peptide activates salicylic  
856 acid signalling in maize. *Nature Plants* **4**, 172–180.

857 **Table 1. Identified apoplastic inhibitors from plant origin.**  
858 Shotgun MS analysis of F11, CT and mock isotopically labeled apoplastic proteomes  
859 screened for the presence of protease inhibitors.

| ID      | Inhibitor annotation                                 | unique peptide | Sequence coverage [%] | MQ score |
|---------|------------------------------------------------------|----------------|-----------------------|----------|
| R_12141 | Cystatin domain (IPR000010) *                        | 2              | 12.2                  | 22.9     |
| R_196   | Proteinase inhibitor I13 **                          | 2              | 54.3                  | 3.6      |
| R_2071  | Cystatin domain (IPR000010) *                        | 2              | 8.9                   | 10.1     |
| R_2240  | Proteinase inhibitor I13 **                          | 1              | 28.2                  | 188.6    |
| R_27228 | Cystatin domain (IPR000010) *                        | 2              | 15.2                  | 4.9      |
| R_28259 | Proteinase inhibitor I12, Bowman-Birk type **        | 2              | 17.1                  | 51.9     |
| R_386   | Bowman-Birk type proteinase inhibitor (IPR035995) ** | 1              | 10.0                  | 25.0     |

860 Inhibitor identity (ID).

861 Inhibitor annotation based on the uniprot database ([www.uniprot.org](http://www.uniprot.org)).

862 MaxQuant score (MQ score).

863 \* Cysteine protease inhibitor family (cystatin domain).

864 \*\* Serine proteinase inhibitor family



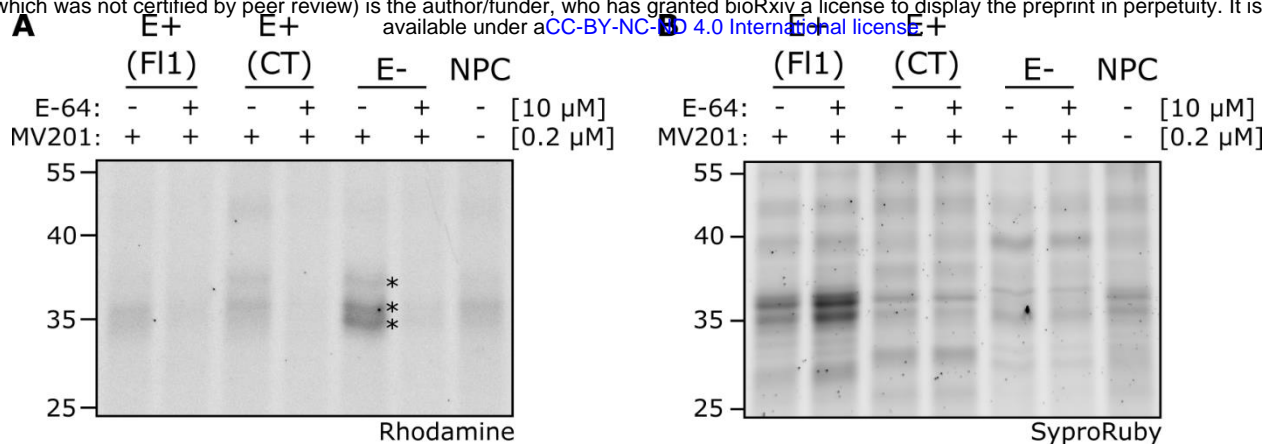

**Fig. 1.** Activity of apoplastic PLCPs in *Epichloe festucae* infected *Lolium perenne* leaves. Leaf apoplastic fluid of endophyte infected (E+) F11, CT and mock (E-) plants was isolated. Samples were pre-incubated for 15 min with E-64 or the equivalent amount of DMSO before labelling with the fluorescent activity-based probe MV201. (A) Samples were separated via SDS-PAGE and labelled PLCPs were visualized via in-gel fluorescent scanning using a rhodamine filter (Ex. 532 nm, Em. 580 nm). Asterisks indicate active PLCPs. (B) Sample loading was monitored using SyproRuby staining (Ex. 450 nm, Em. 610 nm). Numbers on the left side of gel pictures indicate the protein ladder in KDa.

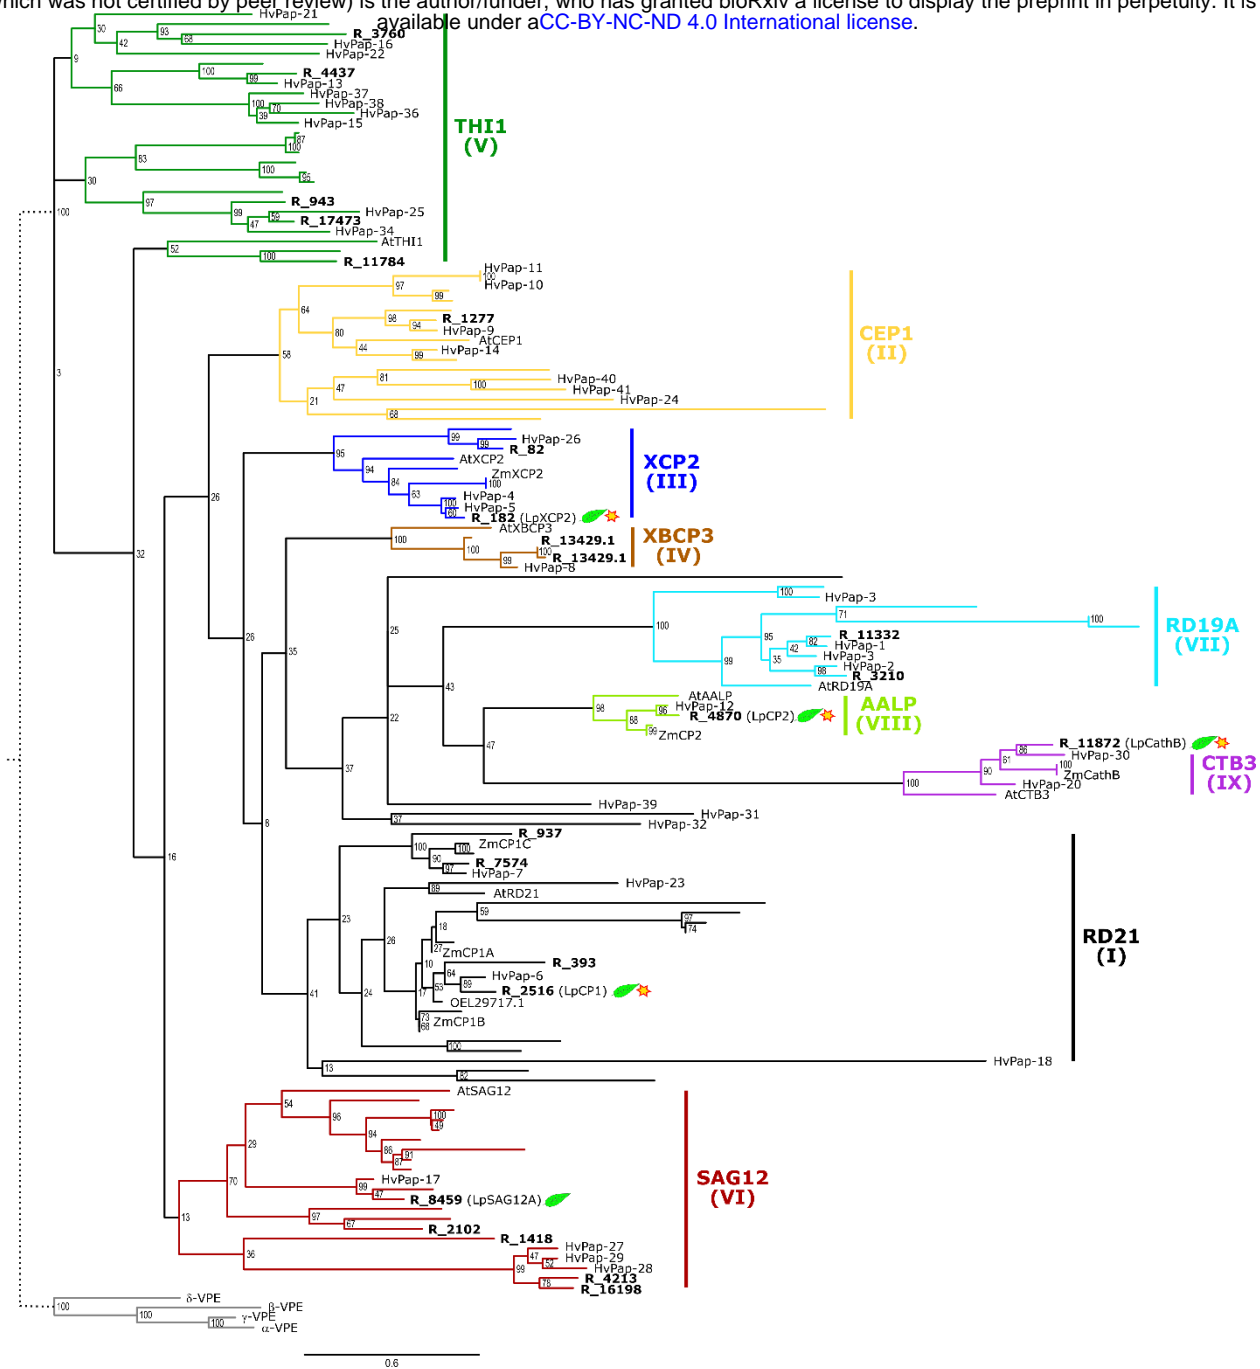

**Fig. 2.** Phylogeny and subfamily classification of *L. perenne* PLCPs. Phylogenetic analysis was performed using 23 *L. perenne* PLCP sequences identified via functional domain analysis (R numbers), 52 PLCP sequences from the maize line B73 obtained from MEROPS database ([www.ebi.ac.uk/merops](http://www.ebi.ac.uk/merops), branches without label due to space constriction), 6 PLCP sequences from the maize line EGB, and 38 PLCP sequences of *Hordeum vulgare* (HvPaps). The four legumains (AtVPEs) from *A. thaliana* were used to root the phylogenetic tree and one member of each PLCP subfamily also from *A. thaliana* (bold, colored) for the subfamily classification. In this analysis, full length sequences were used, including signal peptide, auto-inhibitory

pro-domain, protease C1-domain and if present granulin domain. Leaf symbol, proteases identified in the leaf apoplast proteome analysis; star, proteases found as active enzymes in apoplast using ABPP. To fit the phylogenetic tree in the window the branch of the outgroup has been shortened (dotted line).

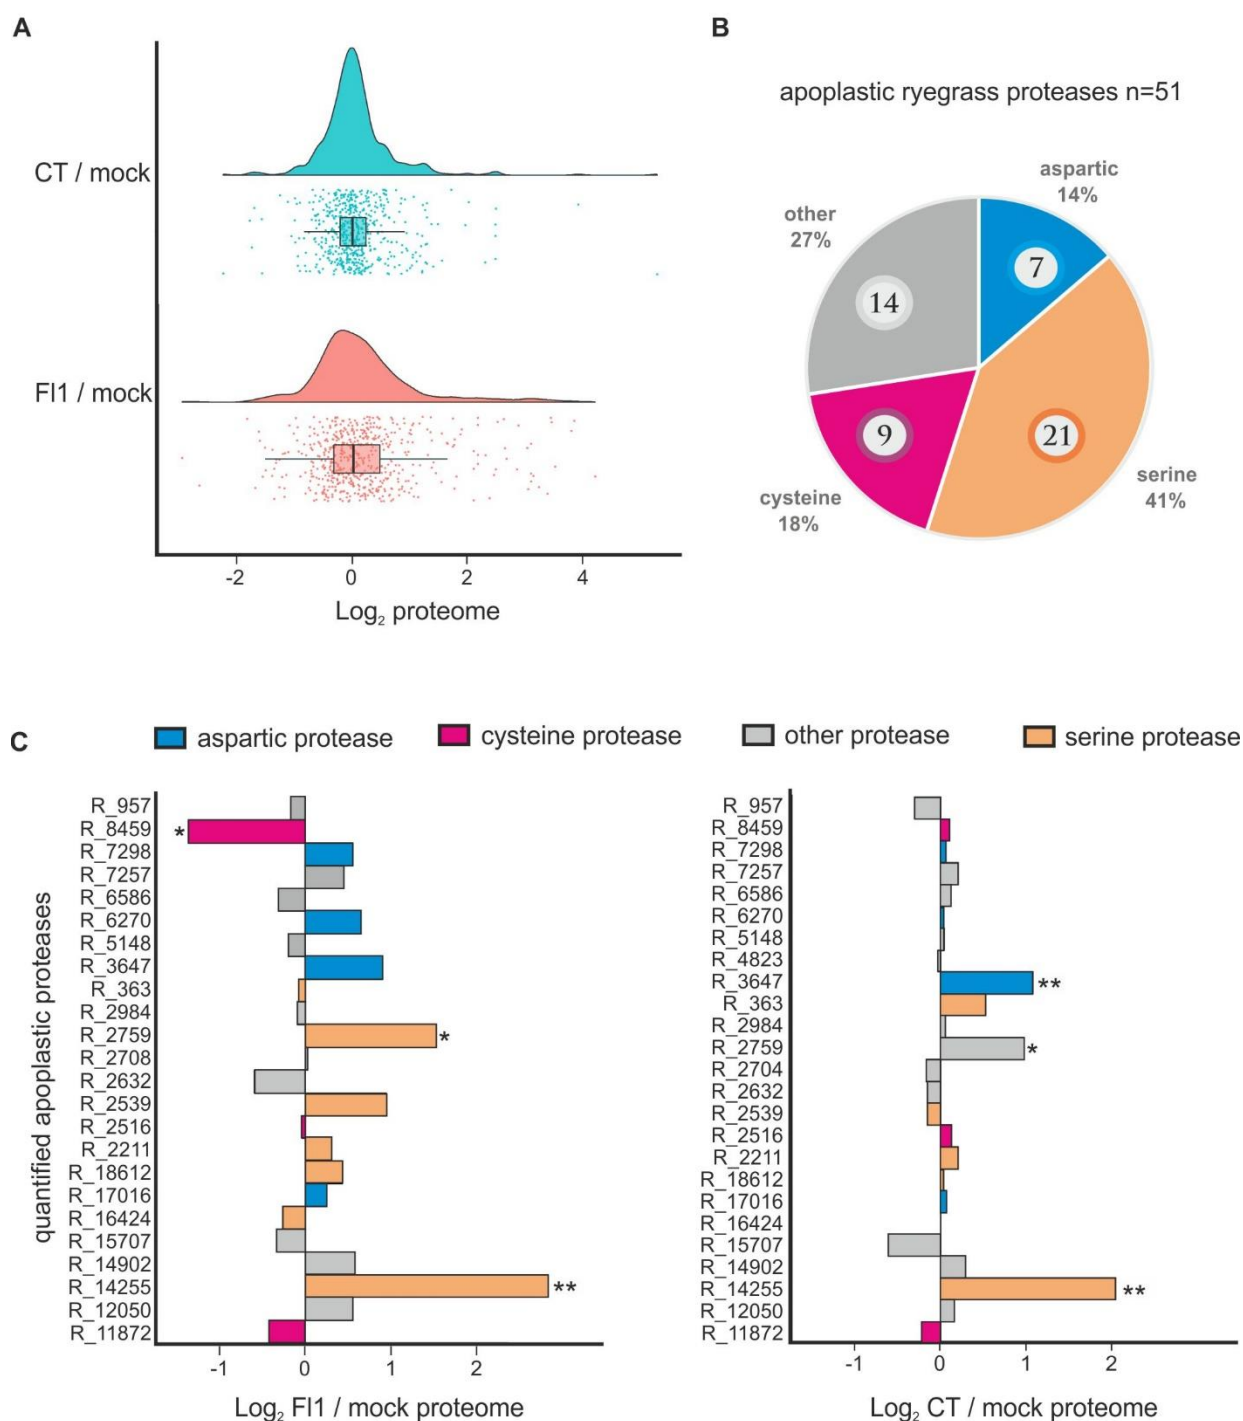

**Fig. 3.** Apoplast proteome analysis of FI1 and CT infected and mock-treated leaves. (A) Raincloud plot of FI1/mock and CT/mock protein quantification. Apoplast proteins from FI1, CT and mock-treated plants were stable isotope labelled by reductive dimethylation. The average log<sub>2</sub>-transformed ratios FI1/mock and CT/mock of the 530 and 552 proteins, respectively, were calculated for proteins quantified in at least

two of three replicates. Average fold changes are shown as a raincloud plot combining a density graph with single dot plots for each quantified protein and a boxplot depicting the mean of the data assembly. (B) Overview of identified apoplastic proteases in the leaf proteome analysis. 51 ryegrass proteases identified in our proteome analysis were grouped according to their catalytic mechanism: aspartic proteases (blue), cysteine proteases (magenta), serine proteases (peach) and other (grey). The total number of each group of identified proteases is shown in circles. The percentage (%) of protein groups was calculated based on the total number of identified proteases. (C) Quantification of apoplastic proteases in FL1 and CT infected leaves. Mean  $\log_2$ -transformed ratios (n=3 biological replicates, at least quantified in 2 out of 3 replicates) are individually plotted for each of the proteases. 24 and 25 proteases were quantified for FL1/mock and CT / mock, respectively. \* represent significant differences (\* =  $p < 0.05$ , \*\* =  $p < 0.01$ , LIMMA-moderated Students *t*-test).

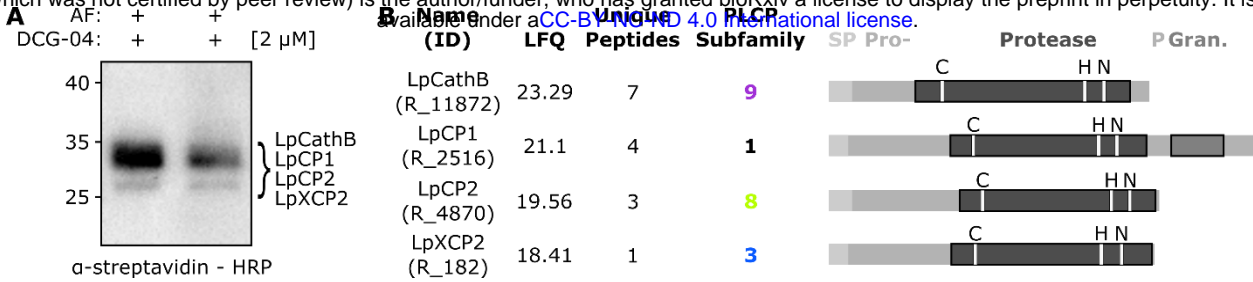

**Fig. 4.** Identification of active *L. perenne* apoplastic PLCPs. (A) Pull-down of apoplastic PLCPs using DCG-04. Apoplastic fluid (AF) of endophyte free plants was labelled with the biotinylated probe DCG-04. A background control without DCG-04 (no-probe control, NPC) was performed. Labelled proteins were purified using streptavidin beads. Biotinylated proteins were detected using  $\alpha$ -streptavidin-HRP antibody. Shown is a representation of two biological replicates. Estimated sizes for *L. perenne* (Lp) PLCPs: LpCathB, LpCP1, LpCP2 and LpXCP2 are shown in brackets. (B) Schematic representation of identified apoplastic PLCPs of *L. perenne*. Pull – down samples were subjected to on bead digest (OBD) and subsequent mass spectrometry analysis. Samples were analysed in triplicates and only proteases present in at least two of the three replicates were considered. SP = signal peptide, Pro- = auto-inhibitory prodomain, Protease = protease C1-domain, P = Proline-rich domain, Gran = granulin domain. Letters above the protease domain represent the catalytic triad (C, cysteine; H, histidine; N, asparagine). Coloured numbers show the PLCP subfamily. LFQ, MaxQuant- label-free quantification intensity as a measure of abundance.

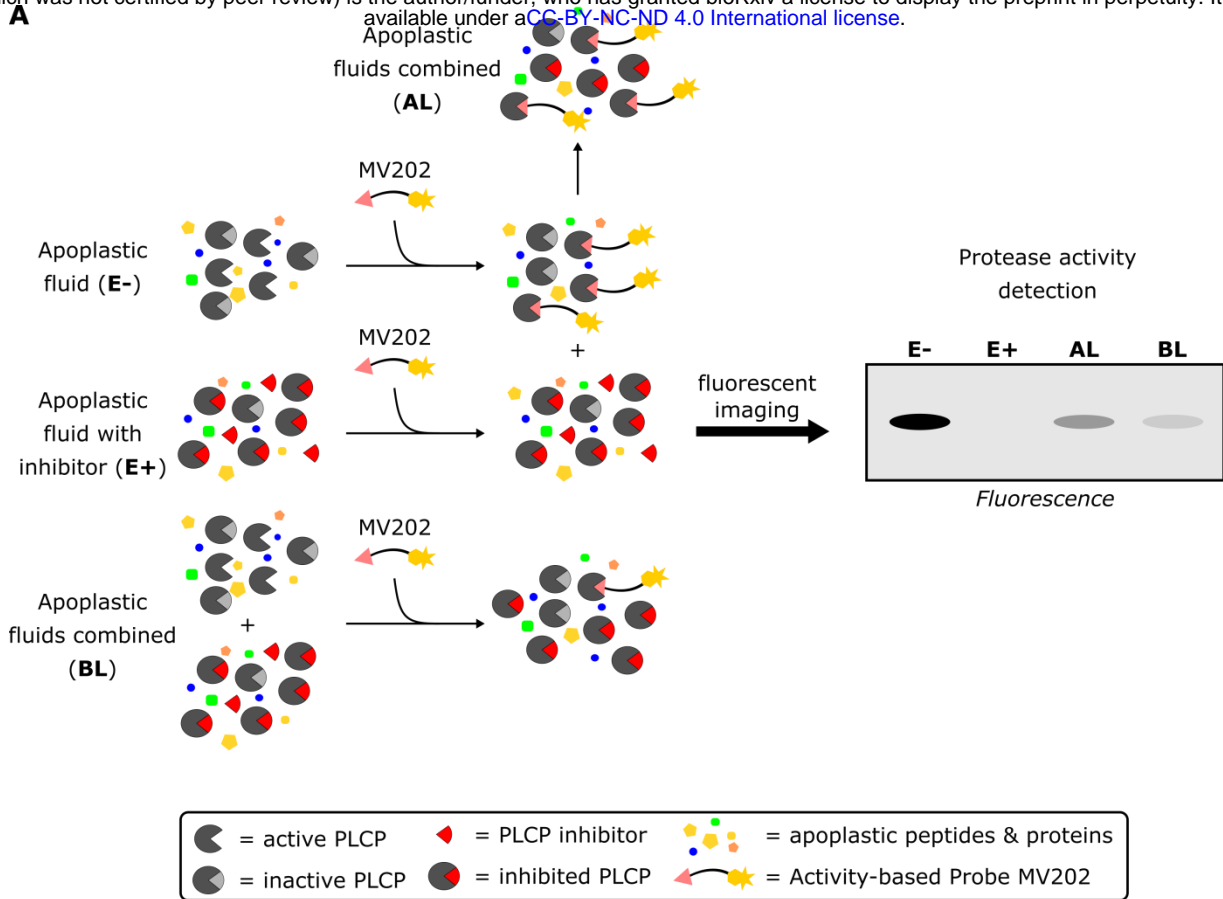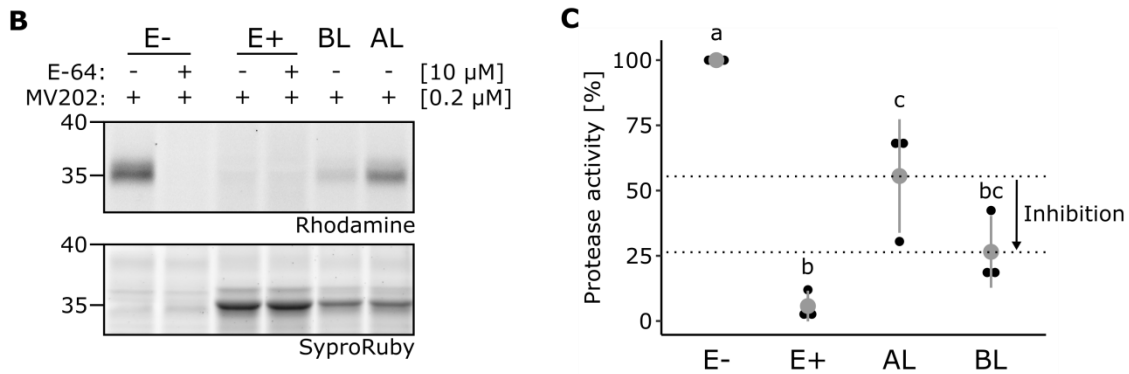

**Fig. 5.** An apoplastic PLCP inhibitor is present in *E. festucae* infected plants. (A) Convolution ABPP workflow. Apoplastic fluid with (E+) and without (E-) potential PLCP inhibitor is mixed in a 1:1 ratio, allowing the potential PLCP inhibitor in E+ to inhibit active PLCPs in E- before labelling (BL). All three fluids (E-, E+, BL), were labelled with the activity-based probe MV202. As control, E+ and E- are mixed (1:1) after labelling (AL). The fluorescent signals detected in AL should represent the average signals of E+ and E-. If excess inhibitor is present in E+ apoplastic fluid, signal intensities of BL will be lower than signal intensities of AL. Figure was adapted from Chandrasekar *et al.*, 2017. (B) An apoplastic PLCP inhibitor is produced during

*E. festucae* infection. Apoplastic fluid of E+ and E- plants was isolated and pre-incubated with E-64 or the equivalent amount of DMSO followed by labelling with MV202. One volume of E+ fluid and one volume of E- fluid were incubated for 45 min prior to the labelling with MV202 (BL). After labelling E+ and E- were mixed in a 1:1 ratio (AL). Samples were separated via SDS-PAGE and labelled PLCPs were visualized by in-gel fluorescent scanning using a rhodamine filter. Sample loading was visualized via SyproRuby staining. (C) Quantification of convolution ABPP. Labelling intensities were quantified and normalized to samples treated with E-64. AL and BL were normalized to the average of E-64 treated samples of E+ and E-. Protease activity of E- was set to 100% and PLCP activity was calculated in relation to the E- sample. The red dot represents the mean of three independent biological replicates (black dots), while the red line represents the standard deviation. Different letters indicate significant differences between the means according to Tukey's test ( $P < 0.05$ ).



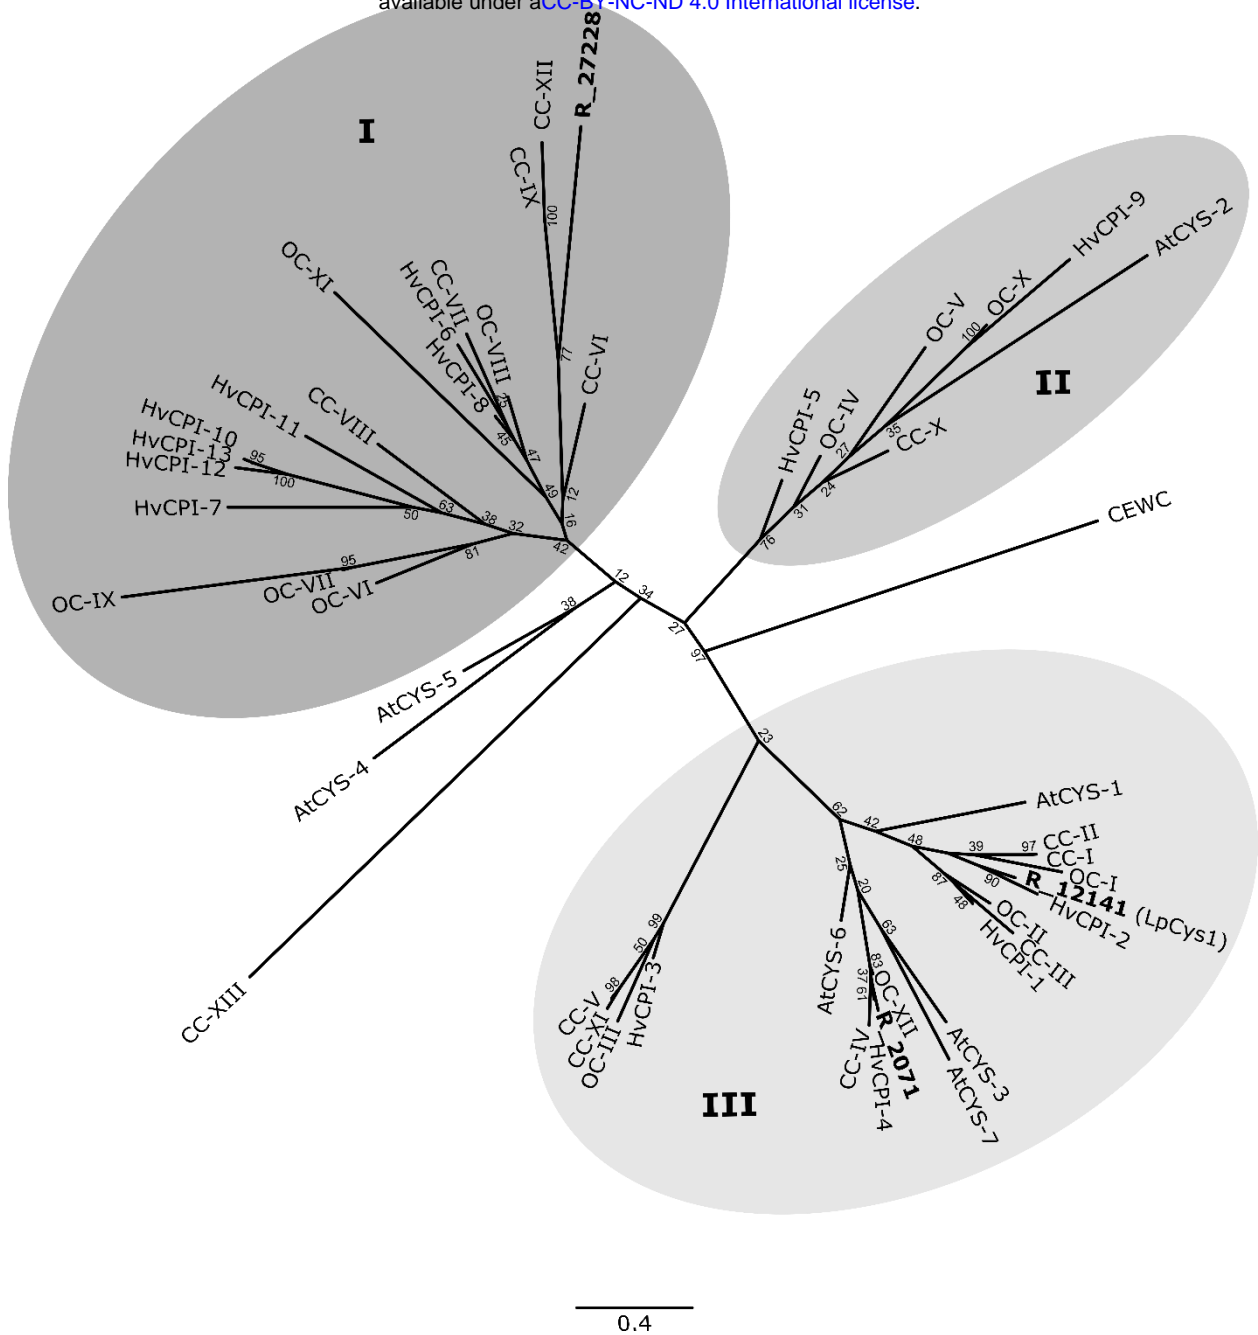

**Fig. 6.** Phylogenetic analysis of identified cystatins from *L. perenne*. Alignment of full-length sequences of *L. perenne* R\_12141 (LpCys1), R\_2071 and R\_27228 (LpCys9) as well as *H. vulgare* (HvCPI), *Z. mays* (CC), *O. sativa* (OC), *A. thaliana* (AtCYS) and the chicken cystatin (CEWC) were generated using MAFFT. The unrooted radial tree was generated with RAxML (v8.2.12). 100 bootstraps were performed and bootstrap values are indicated. The tree was visualized with FigTree. Grey circles show the main three clusters (I, II and III) obtained for the tested cystatins.

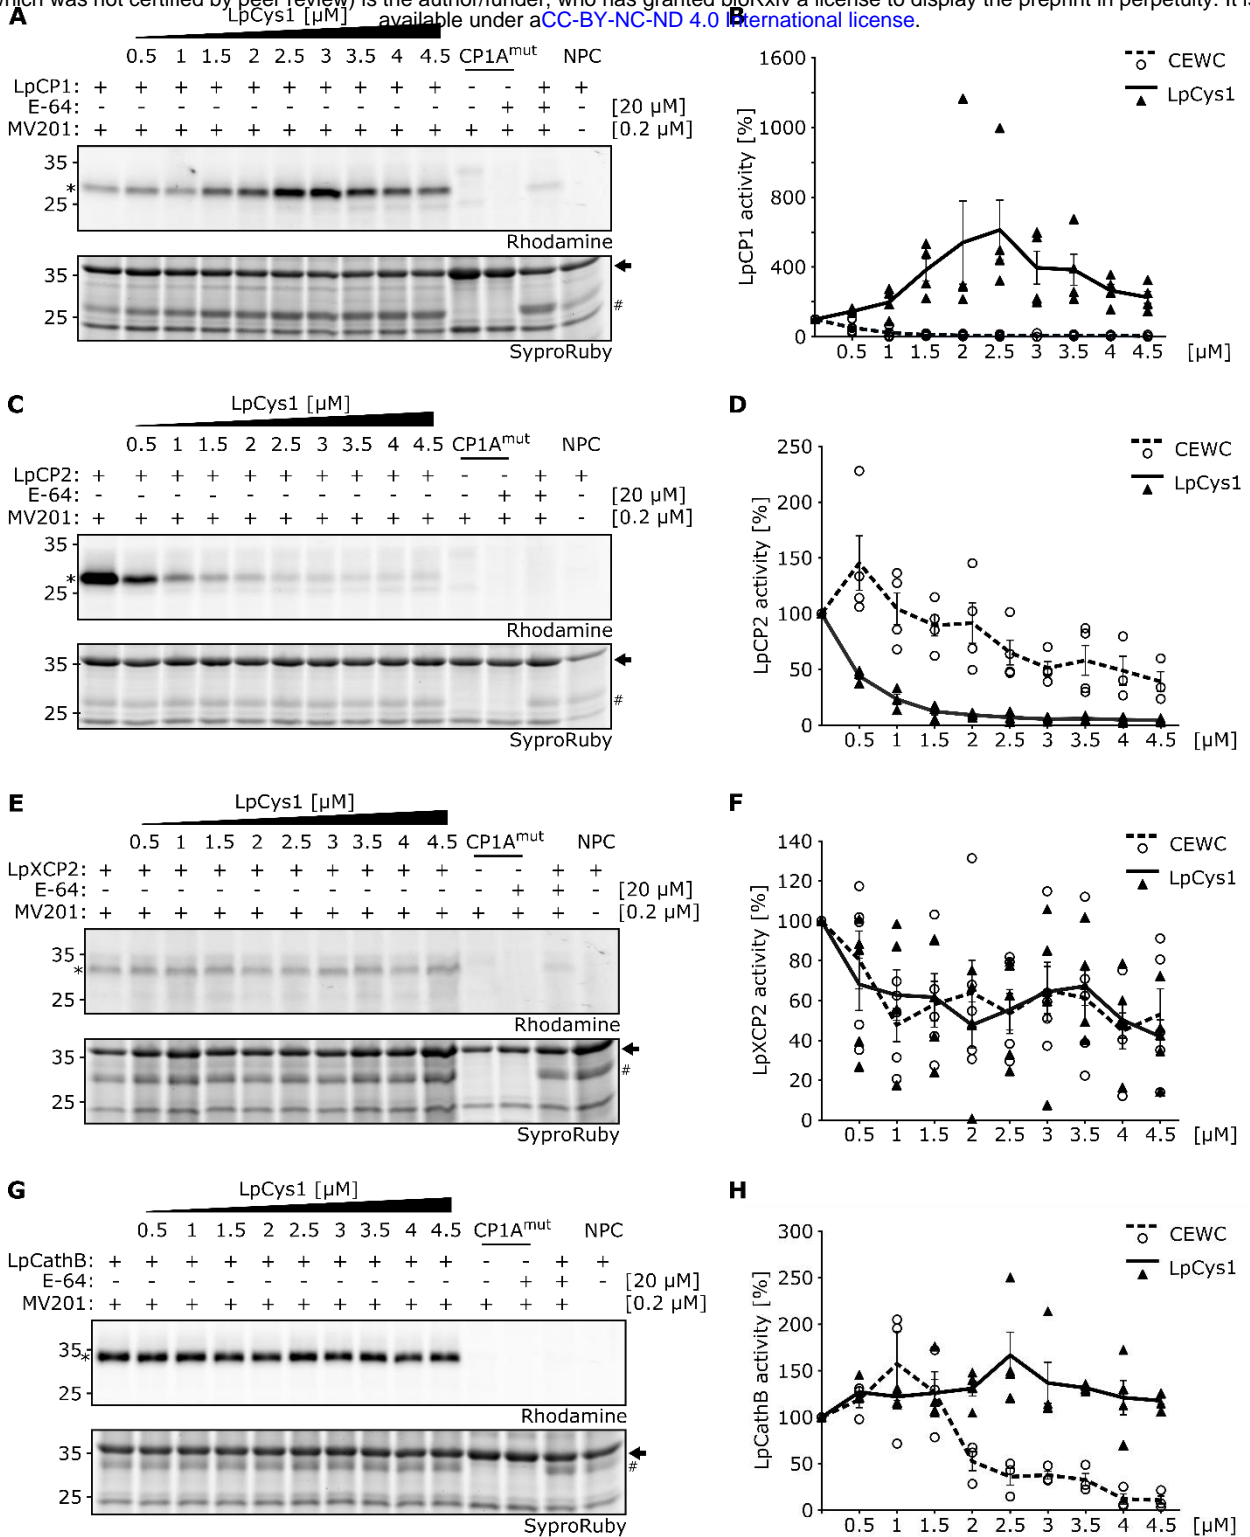

**Fig. 7.** Inhibitory activity of LpCys1 on overexpressed ryegrass PLCPs. Four PLCPs of *L. perenne* were overexpressed in *N. benthamiana* using Agrobacterium-mediated transformation. Apoplastic fluid containing PLCPs was isolated and monitored using the fluorescent probe MV201. Samples were pre-incubated for 15 min with 20  $\mu\text{M}$  E-64 or a concentration range (0 – 4.5  $\mu\text{M}$ ) of heterologously expressed LpCys1 or

CWEC followed by 2 h labeling with 0.2  $\mu\text{M}$  MV201. As background controls, samples containing CP1A<sup>mut</sup>, an inactive maize PLCP, and the no-probe control (NPC) were prepared. The activity and inhibitory effect of LpCys1 on LpCP1 (A), LpCP2 (C), LpXCP2 (E) and LpCathB (G) was analysed using in gel fluorescent scanning and as a loading control SyproRuby staining was performed. For each analysed PLCP (marked as asterisk) signals were quantified and normalized to a loading control signal (marked with an arrow) and activity without inhibitor was set to 100%. Normalized activity values [%] for LpCP1 (B), LpCP2 (D), LpXCP2 (F) and LpCathB (H) were plotted against the concentration [ $\mu\text{M}$ ] of LpCys1 (solid line) and CWEC (dotted line). Error bars represent the standard error of three biological replicates.
